# Supplementary material for: Engineering N-(2-pyridyl)aminoethyl alcohols as potential precursors of thermolabile protecting groups
Source: Royal Society of Chemistry journal article supplement (doi:10.1039/c1nj20584f), 2011-11-28

# Engineering N-(2-pyridyl)aminoethyl alcohols as potential precursors of thermolabile protecting groups

Marcin K. Chmielewski\*, Ewa Tykarska<sup>#</sup>, Wojciech T. Markiewicz, Wojciech Rypniewski

*Institute of Bioorganic Chemistry, Polish Academy of Science, Noskowskiego 12-14, 61-704 Poznań, Poland, <sup>#</sup>Department of Chemical Technology of Drugs, University of Medical Sciences, Grunwaldzka 6, 60-780 Poznan, Poland*

## Contents:

|                                                                              |    |
|------------------------------------------------------------------------------|----|
| (1) General remarks                                                          | 1  |
| (2) Table 1. NMR analysis of five compounds                                  | 3  |
| (3) Table 2 of X-ray experimental details of <b>1</b> to <b>5</b>            | 3  |
| (4) Potentiometric measurements                                              | 4  |
| (5) <sup>1</sup> H <sup>13</sup> C NMR spectra and mass spectra for <b>1</b> | 6  |
| (6) <sup>1</sup> H <sup>13</sup> C NMR spectra and mass spectra for <b>2</b> | 9  |
| (7) <sup>1</sup> H <sup>13</sup> C NMR spectra and mass spectra for <b>3</b> | 12 |
| (8) <sup>1</sup> H <sup>13</sup> C NMR spectra and mass spectra for <b>4</b> | 16 |
| (9) <sup>1</sup> H <sup>13</sup> C NMR spectra and mass spectra for <b>5</b> | 19 |
| (10) Analysis of thermostability of compound <b>4</b>                        | 21 |

## (1) General remarks:

All reagents (analytical grade) were obtained from commercial suppliers and used without further purification. Hexane and dichloromethane were freshly distilled from CaH<sub>2</sub> and P<sub>2</sub>O<sub>5</sub>, respectively. All other solvents and liquid reagents were dried through storage over activated 3 Å (MeOH, MeCN) molecular sieves. <sup>1</sup>H, <sup>13</sup>C-NMR. The NMR spectra were recorded at 298 K on a Bruker Advance DRX 400 spectrometer operating at frequencies 400.13201 MHz (<sup>1</sup>H) and 100.62281 MHz (<sup>13</sup>C).

Liquid secondary ion mass spectrum (low and high resolution) was obtained on an AMD 604 two sector mass spectrometer of reverse B/E geometry, made by AMD Intectra (Germany). A CsI gun supplied the primary ion beam (12 keV, Cs<sup>+</sup>). The secondary ion beam was accelerated to 8 kV. The compound was dissolved in 3-nitrobenzyl alcohol (Aldrich)

**Table 1.** NMR analysis of five compounds

| Hydrogen at | <b>1</b>                  | <b>2</b>                | <b>3</b>                                                                  | <b>4</b>                         | <b>5</b>                    |
|-------------|---------------------------|-------------------------|---------------------------------------------------------------------------|----------------------------------|-----------------------------|
| C3          | 6.54 dd J=4.95, 7.03 Hz   | 6.44 dd J=7.09          | 6.47 dt Jt=7.23 Hz                                                        | X                                | 6.49 m                      |
| C4          | 7.43 2xdd J=2.01, 7.03 Hz | 7.33 dd J=1.99, 7.09 Hz | 7.24 t Jt=7.23 Hz                                                         | 8.27 d J=4.77Hz                  | 7.35 dd J= 1.96 Hz, 7.03 Hz |
| C5          | 6.58 dt J=1.38, 8.67 Hz   | 6.48 d J= 8.5 Hz        | 6.45 d Jd=8.6 Hz                                                          | 6.56 t Jt=4.77 Hz                | 6.47 m                      |
| C6          | 8.06 dd J= 1.38, 4.86 Hz  | 7.94 dd J= 1.25, 5.05Hz | 7.97 dd Jd=1.16, 4.95 Hz                                                  | 8.27 d J=4.77Hz                  | 7.96 dd J=1.85, 4.94 Hz     |
| C8          | 3.59 m 4H                 | 3.52 t J= 6.01 Hz       | 4.76 q Jq=4.4,                                                            | 4.7 q J=3.8 Hz, J=7.6 Hz         | 4.19 t Jt= 5.7 Hz           |
| C7          |                           | 3.31 q J= 5.87, 6.01 Hz | 9a 3.52 ddd Jd=4.4, 6.5, 13.20 Hz<br>9b 3.28 t, d Jt=4.93 Hz, Jd=13.05 Hz | 3.54 ddd Jt=4.72 Hz<br>Jd=7.6 Hz | 3.51 q Jq=5.56 Hz           |

\* To whom correspondence should be addressed.

|          |                        |        |           |                   |                   |
|----------|------------------------|--------|-----------|-------------------|-------------------|
| O1       | 4.79 m                 | 4.76 m | 5.68 m    | 5.5 d J= 4.06 Hz  |                   |
| N2       |                        | 6.42 m | 6.52 m1H  | 6.96 t J= 4.76 Hz | 6.67 t J= 5.64 Hz |
| aromatic | 7.30 m 2H<br>7.21 m 3H |        | 7.35 m 5H | 7.30 m 5H         |                   |

The X-ray data, collected at the DESY synchrotron, were of good quality and crystal structures were solved for all the reported compounds<sup>1</sup> (Table 4)

**Table 2.** X-ray experimental details of **1** to **5**.

|                                    | <b>1</b>                                         | <b>2</b>                                        | <b>3</b>                                         | <b>4</b>                                         | <b>5</b>                                                      |
|------------------------------------|--------------------------------------------------|-------------------------------------------------|--------------------------------------------------|--------------------------------------------------|---------------------------------------------------------------|
| formula                            | C <sub>14</sub> H <sub>16</sub> N <sub>2</sub> O | C <sub>7</sub> H <sub>10</sub> N <sub>2</sub> O | C <sub>13</sub> H <sub>14</sub> N <sub>2</sub> O | C <sub>12</sub> H <sub>13</sub> N <sub>3</sub> O | C <sub>15</sub> H <sub>18</sub> N <sub>4</sub> O <sub>3</sub> |
| fw                                 | 228.29                                           | 138.17                                          | 214.26                                           | 215.25                                           | 302.33                                                        |
| crystal system                     | monoclinic                                       | orthorhombic                                    | orthorhombic                                     | monoclinic                                       | monoclinic                                                    |
| space group                        | P2 <sub>1</sub> /n                               | Pca2 <sub>1</sub>                               | P2 <sub>1</sub> 2 <sub>1</sub> 2 <sub>1</sub>    | P2 <sub>1</sub> /c                               | C2/c                                                          |
| a, Å                               | 10.756(2)                                        | 8.841(2)                                        | 6.048(1)                                         | 5.605(1)                                         | 32.33(7)                                                      |
| b, Å                               | 5.926(1)                                         | 9.053(2)                                        | 7.315(2)                                         | 20.972(4)                                        | 5.791(1)                                                      |
| c, Å                               | 18.840(4)                                        | 8.630(2)                                        | 24.334(5)                                        | 9.500(2)                                         | 16.392(3)                                                     |
| β, deg                             | 99.58(3)                                         |                                                 |                                                  | 108.1(3)                                         | 104.42(3)                                                     |
| V, Å <sup>3</sup>                  | 1184.1(4)                                        | 690.7(2)                                        | 1076.6(4)                                        | 1061.4(4)                                        | 2973.7(10)                                                    |
| wavelength, Å                      | 0.81620                                          | 0.8125                                          | 0.81620                                          | 0.81620                                          | 0.80800                                                       |
| Z                                  | 4                                                | 4                                               | 4                                                | 4                                                | 8                                                             |
| Resolution range (Å)               | *20.0-0.76 (0.77-0.76)                           | 10-0.75 (0.76-0.75)                             | 20.0-0.75 (0.76-0.75)                            | 20.0-0.75 (0.76-0.75)                            | 10.0-0.75 (0.76-0.75)                                         |
| D <sub>c</sub> , g/cm <sup>3</sup> | 1.281                                            | 1.329                                           | 1.322                                            | 1.347                                            | 1.351                                                         |
| μ, cm <sup>-1</sup>                | 0.082                                            | 0.092                                           | 0.085                                            | 0.089                                            | 0.097                                                         |
| R <sub>merge</sub> <sup>†</sup>    | 0.050 (0.135)                                    | 0.032 (0.039)                                   | 0.037 (0.095)                                    | 0.028 (0.057)                                    | 0.045 (0.086)                                                 |
| R <sub>1</sub> (obs. data)         | 0.0449                                           | 0.0435                                          | 0.0496                                           | 0.0473                                           | 0.0451                                                        |
| wR <sub>2</sub> (obs. data)        | 0.1207                                           | 0.1213                                          | 0.1389                                           | 0.1328                                           | 0.1283                                                        |
| independ refs                      | 2806                                             | 906                                             | 1566                                             | 2574                                             | 3622                                                          |
| refs I > 2σ(I)                     | 2732                                             | 885                                             | 1524                                             | 2522                                             | 3471                                                          |

\* Values in parenthesis are for the last resolution shell.

<sup>†</sup>  $R_{\text{merge}} = \sum_{hkl} \sum_i |I_i(hkl) - \langle I(hkl) \rangle| / \sum_{hkl} \sum_i I_i(hkl)$ , where  $I_i(hkl)$  and  $\langle I(hkl) \rangle$  are the observed individual and mean intensities of a reflection with the indices  $hkl$ , respectively,  $\sum_i$  is the sum over  $i$  measurements of a reflection with the indices  $hkl$ , and  $\sum_{hkl}$  is the sum over all reflections.

<sup>1</sup> Sheldrick GM. *Acta Cryst.*, A64, 112-122, 2008

Potentiometric measurements carried out in acetonitrile/water (70%:30%)

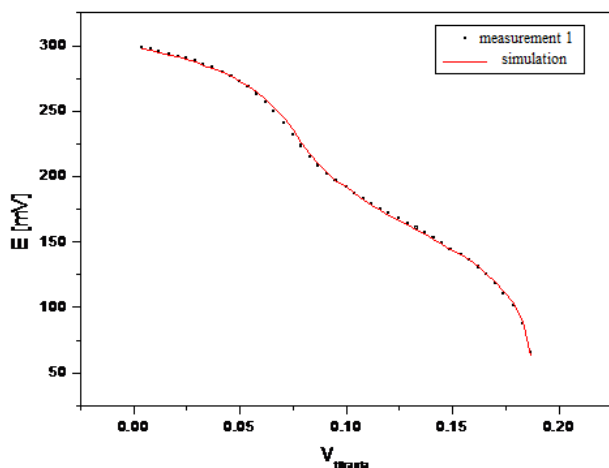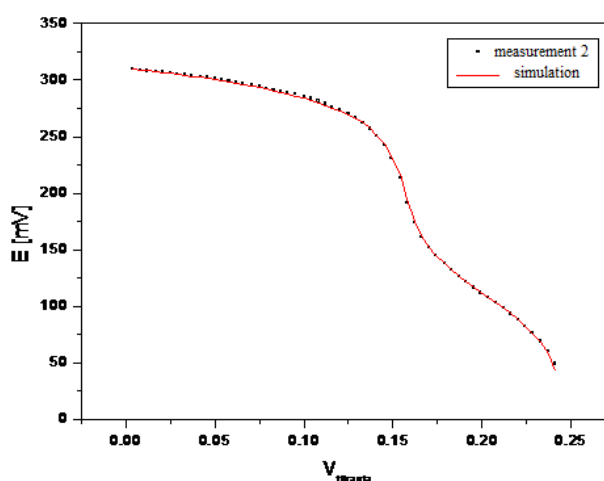

The solution was titrated contained:  
 2,0 ml of **1**  $c = 1,49 \cdot 10^{-3}$  M and acid HCl  $c = 2,81 \cdot 10^{-3}$  M  
 Titrant:  
 NaOH  $c = 2,87 \cdot 10^{-2}$  M

The solution was titrated contained:  
 2,0 ml of **2**  $c = 8,68 \cdot 10^{-4}$  M and methanesulfonic  
 acid  $c = 2,66 \cdot 10^{-3}$  M  
 Titrant:  
 NaOH  $c = 2,13 \cdot 10^{-2}$  M

**pKa = 5,39 ± 0,02**

**pKa = 6,28 ± 0,02**

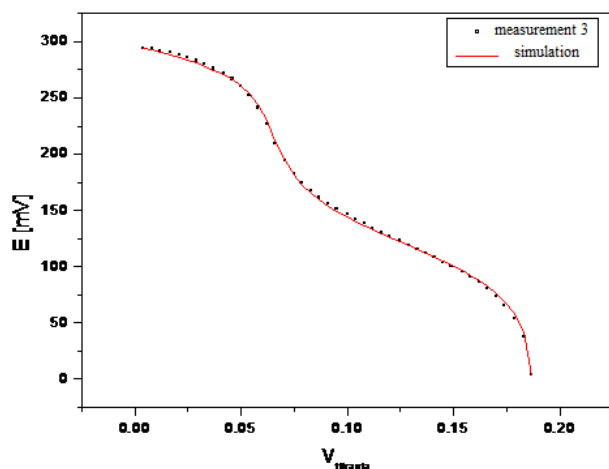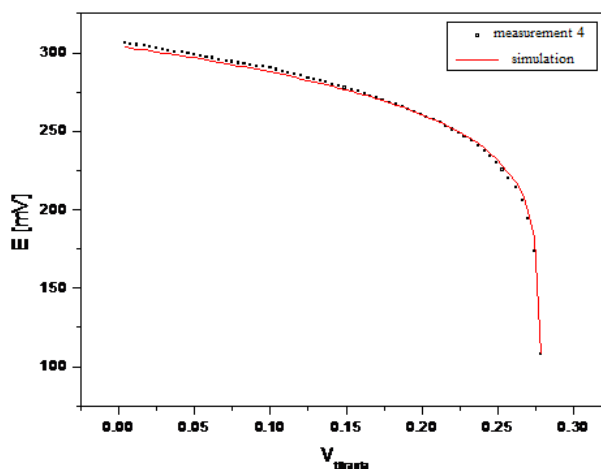

The solution was titrated contained:  
 2,0 ml : **2** o  $c = 1,68 \cdot 10^{-3}$  M and methanesulfonic  
 acid  $c = 2,81 \cdot 10^{-3}$  M  
 Titrant:  
 NaOH  $c = 2,76 \cdot 10^{-2}$  M

The solution was titrated contained:  
 2,0 ml : **4** o  $c = 1,35 \cdot 10^{-3}$  M and methanesulfonic  
 acid  $c = 2,71 \cdot 10^{-3}$  M  
 Titrant:  
 NaOH  $c = 1,34 \cdot 10^{-2}$  M

**pKa = 6,08 ± 0,02**

**pKa = 3,26 ± 0,06**

Potentiometric measurements carried out in methanol/water (50%:50%)

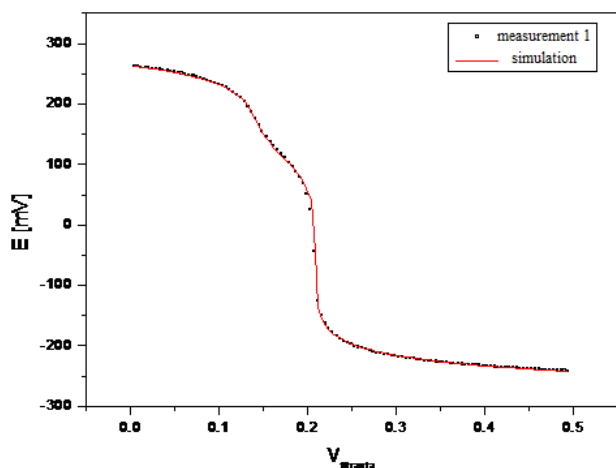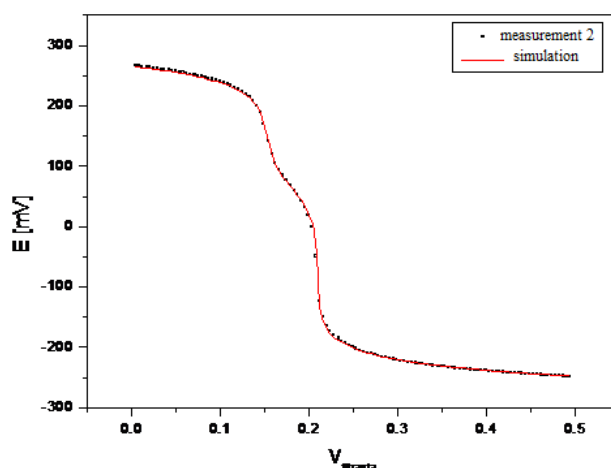

The solution was titrated contained:  
 2.0 ml of **1**  $c = 1.12 \cdot 10^{-3}$  M and 0.5 ml HCl  $c = 1.25 \cdot 10^{-2}$  M  
 Titrant:  
 NaOH  $c = 3.04 \cdot 10^{-2}$  M  
**pKa = 5,44 ± 0,02**

The solution was titrated contained:  
 2.0 ml of **2**  $c = 9.34 \cdot 10^{-4}$  M and 0.5 ml HCl  $c = 1.25 \cdot 10^{-2}$  M  
 Titrant:  
 Roztwór NaOH  $c = 3.04 \cdot 10^{-2}$  M  
**pKa = 6,24 ± 0,02**

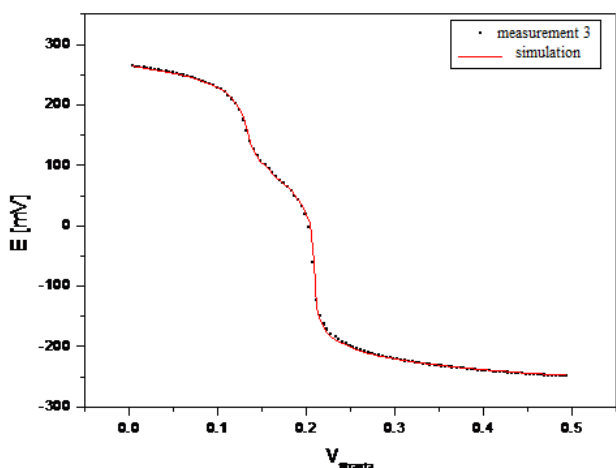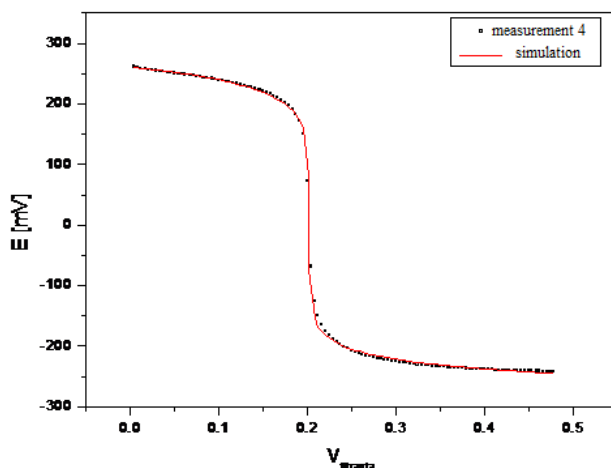

The solution was titrated contained:  
 2.0 ml of **3**  $c = 1.16 \cdot 10^{-3}$  M and 0.5 ml HCl  $c = 1.25 \cdot 10^{-2}$  M  
 Titrant:  
 NaOH  $c = 3.04 \cdot 10^{-2}$  M  
**pKa = 6.07 ± 0.02**

The solution was titrated contained:  
 2.0 ml of **4**  $c = 5.57 \cdot 10^{-4}$  M and 0.5 ml HCl  $c = 1.25 \cdot 10^{-2}$  M  
 Titrant:  
 NaOH  $c = 3.04 \cdot 10^{-2}$  M  
**pKa = 3,58 ± 0,11**

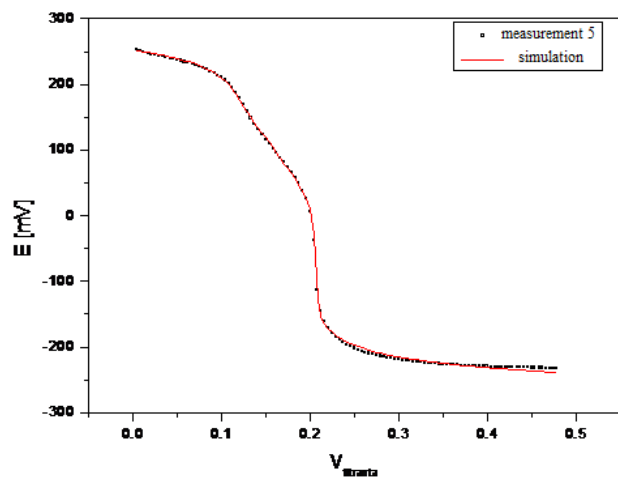

The solution was titrated contained:  
2.0 ml of **5**  $c = 6.88 \cdot 10^{-4}$  M and 0.5 ml HCl  $c = 1.25 \cdot 10^{-2}$  M  
Titrant:  
NaOH  $c = 3.04 \cdot 10^{-2}$  M  
 **$pK_{a1} = 4.97 \pm 0.04$  and  $pK_{a2} = 6.42 \pm 0.03$**

## Compound 1

### $^1\text{H}$ NMR

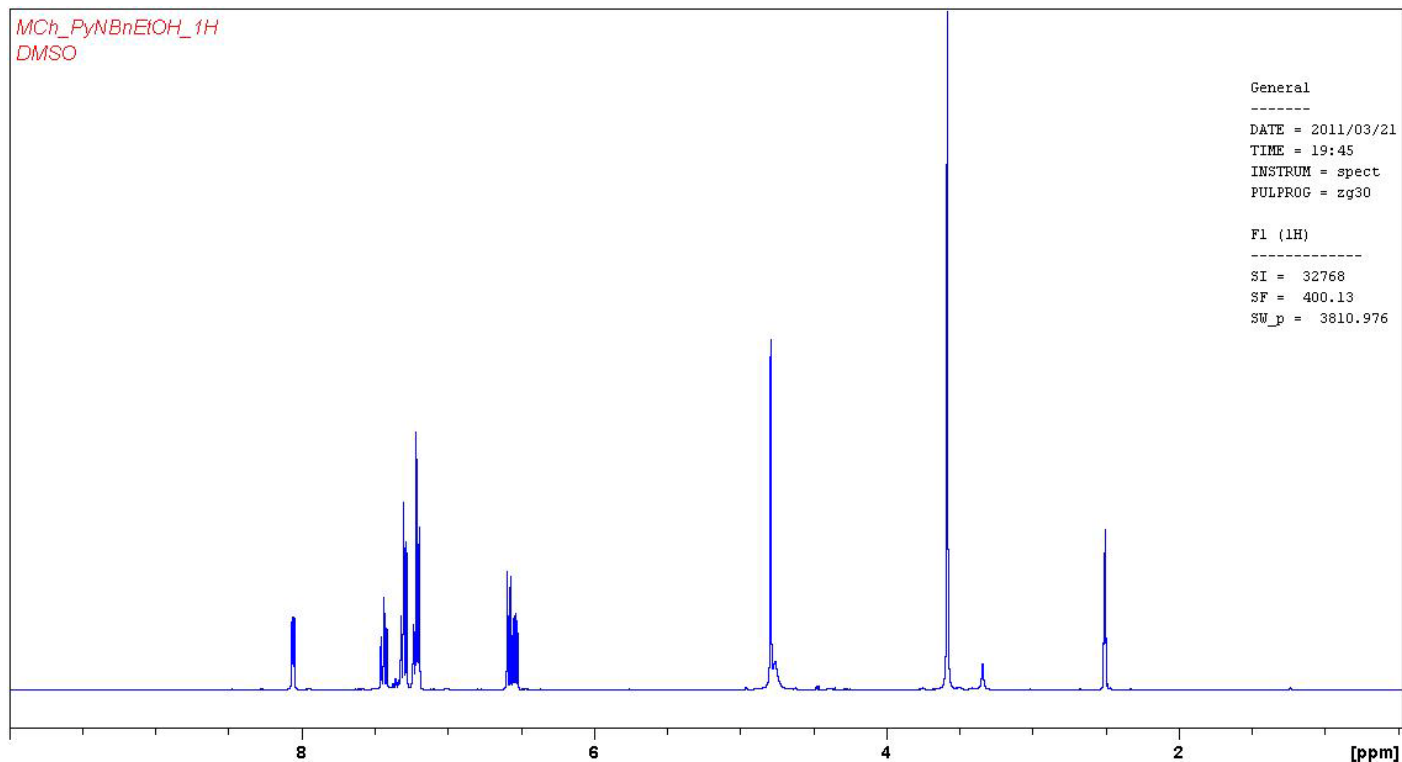

<sup>13</sup>C NMR

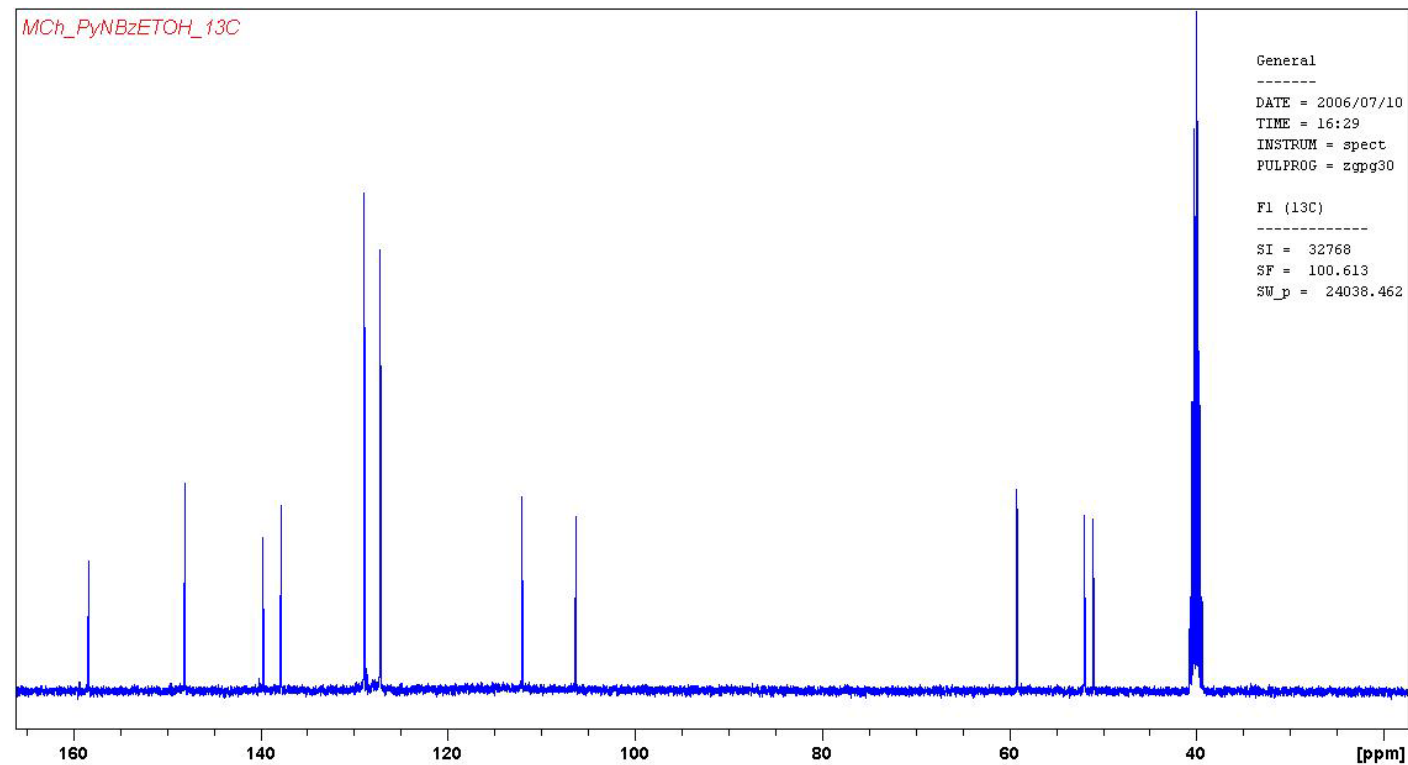

COSY

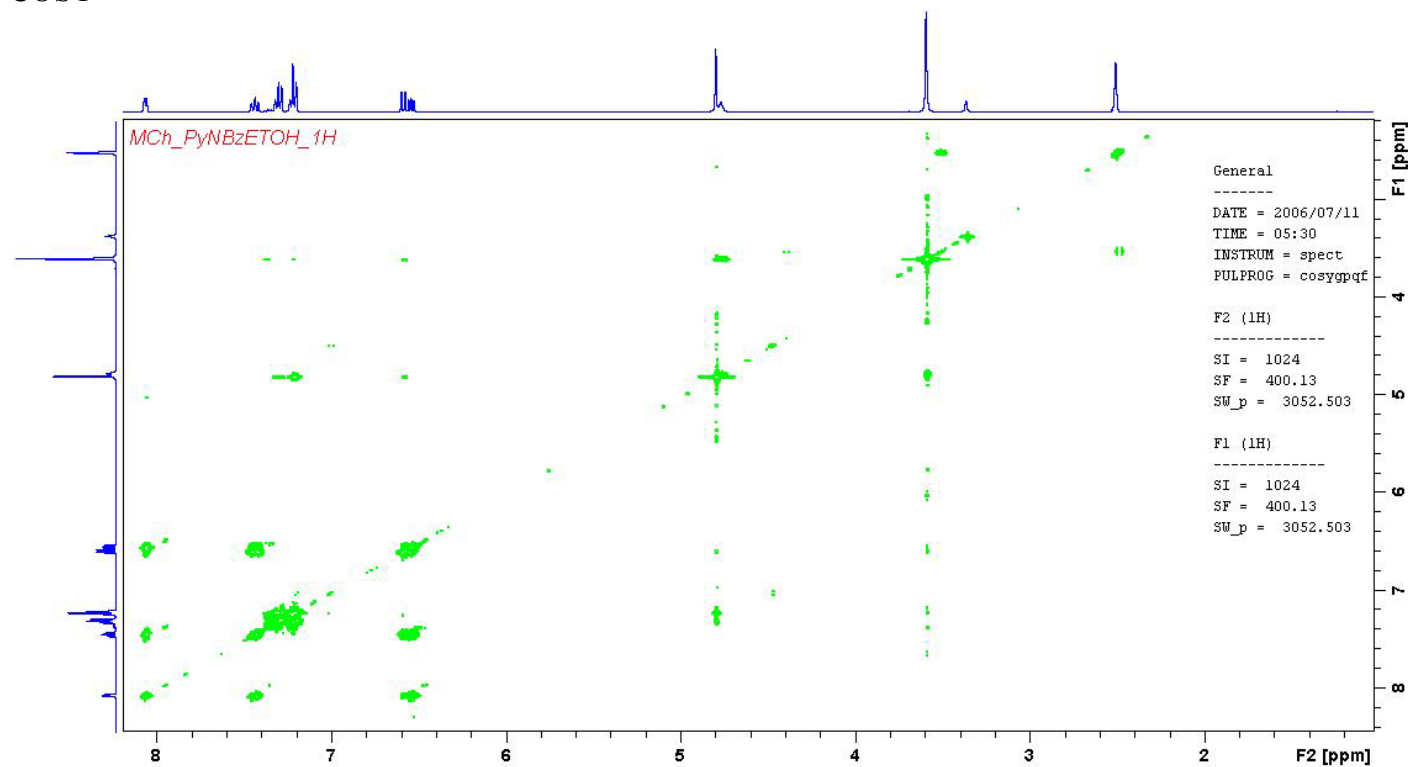

### NOESY

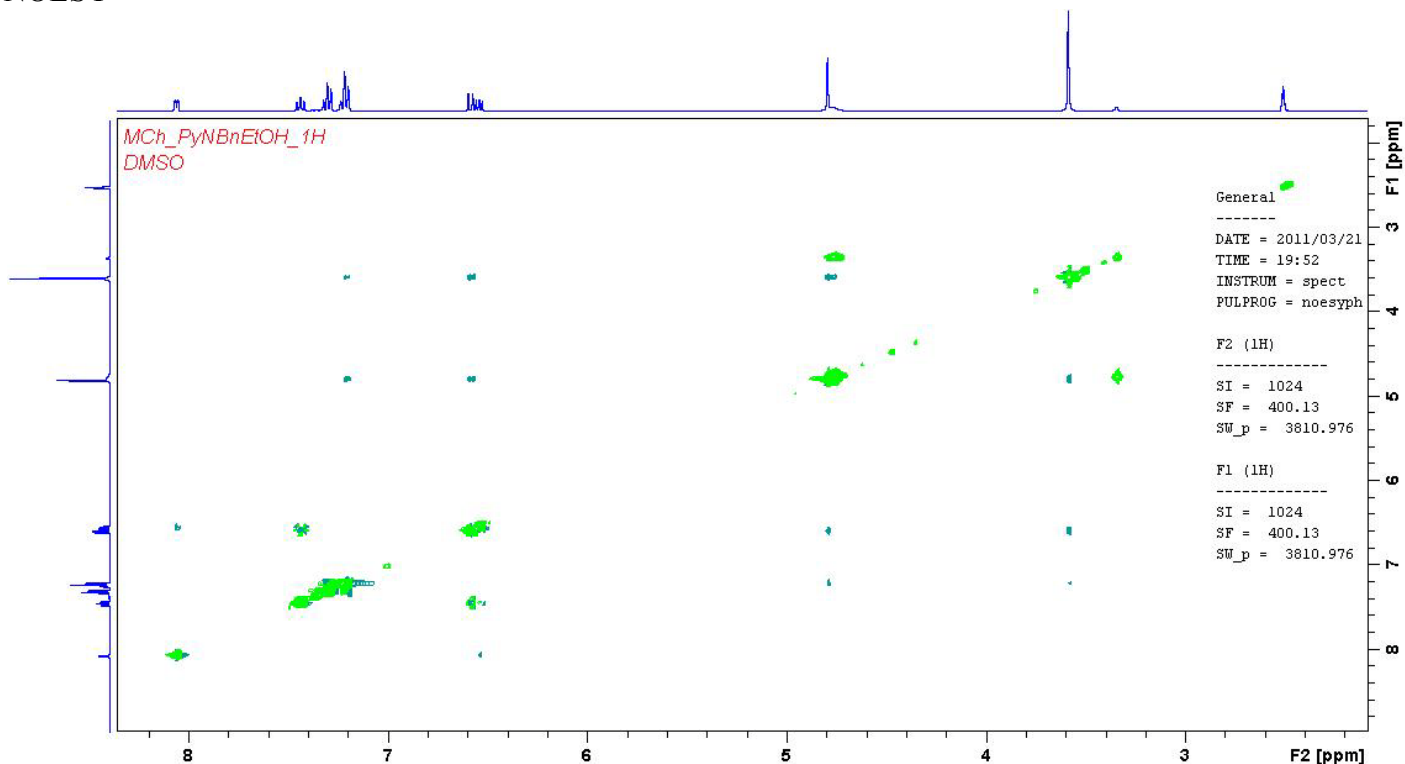

### MS analysis

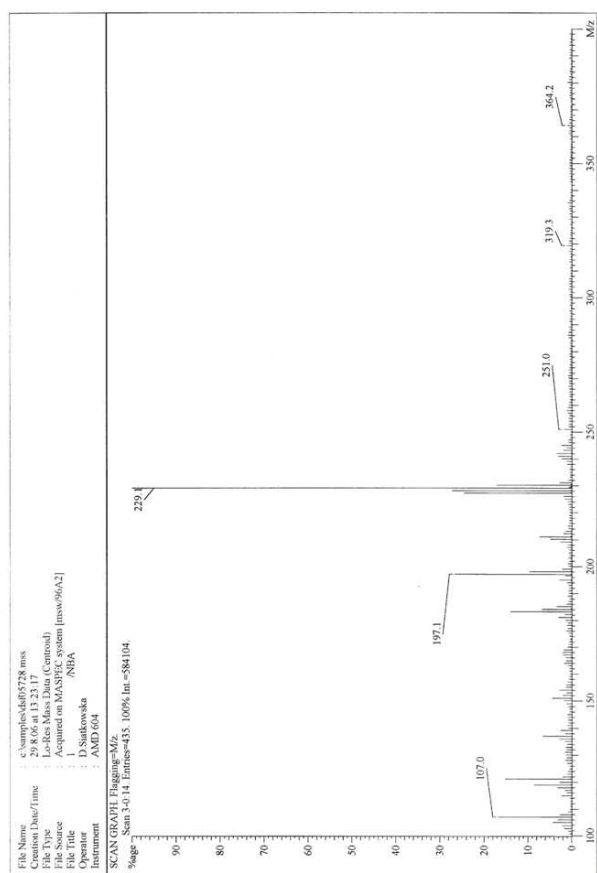

ASD05500.TXT

#### ATOMIC COMPOSITION REPORT

File Name : c:\samples\test3.mss.  
 File Date/Time : 7.9.06 at 12:17:20  
 File Type : Hi-Res Mass Spectrum  
 File Source : Acquired on MASPEC system [msw/96A2]  
 as c:\samples\dsv05744.mss  
 File Title : /NBA  
 Source File : c:\samples\dsv05744.mss  
 Source Scan(s) : 22:31

Sort Field : M/z (ascending).  
 Scan Filter : none.

#### Selected isotopes:

| Symbol | Min | Max | V'cy | Name        |
|--------|-----|-----|------|-------------|
| C      | 0   | 14  | 4    | Carbon-12   |
| H      | 4   | 17  | 1    | Hydrogen-1  |
| N      | 0   | 3   | 3    | Nitrogen-14 |
| O      | 0   | 1   | 2    | Oxygen-16   |

Allowable error = minimum of 10.0 ppm, 5.0 mmu.

Number of Peaks=13.  
 Base Peak=229.13382, 100% Int.=44635.

| Mass      | (%)    | Calculated | ppm | mmu | Formula      |
|-----------|--------|------------|-----|-----|--------------|
| 229.13382 | 100.00 | 229.13409  | 1.2 | 0.3 | C14.H17.N2.O |

\*\*\*\*\* End of Atomic Composition Report \*\*\*\*\*

## Compound 2

### $^1\text{H}$ NMR

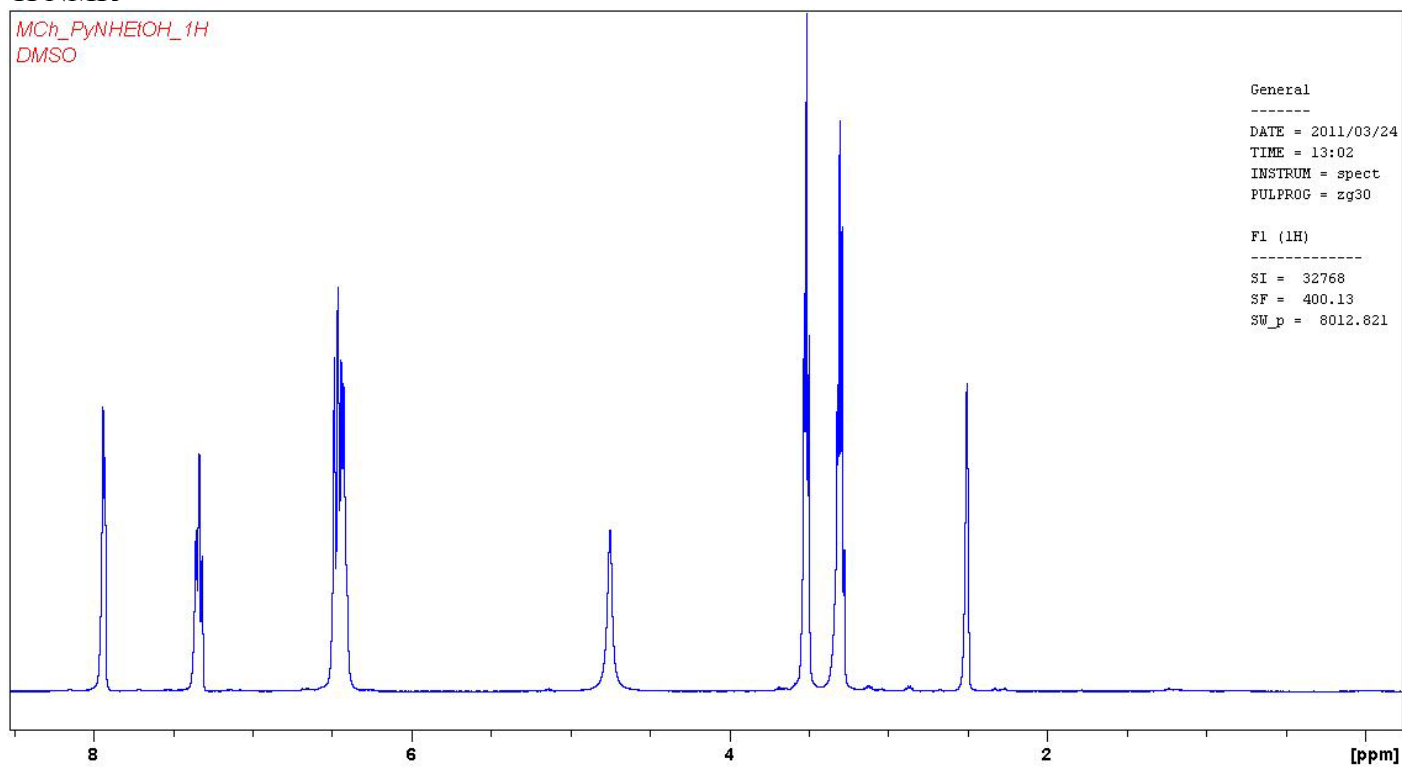

### $^1\text{H}$ NMR+D<sub>2</sub>O

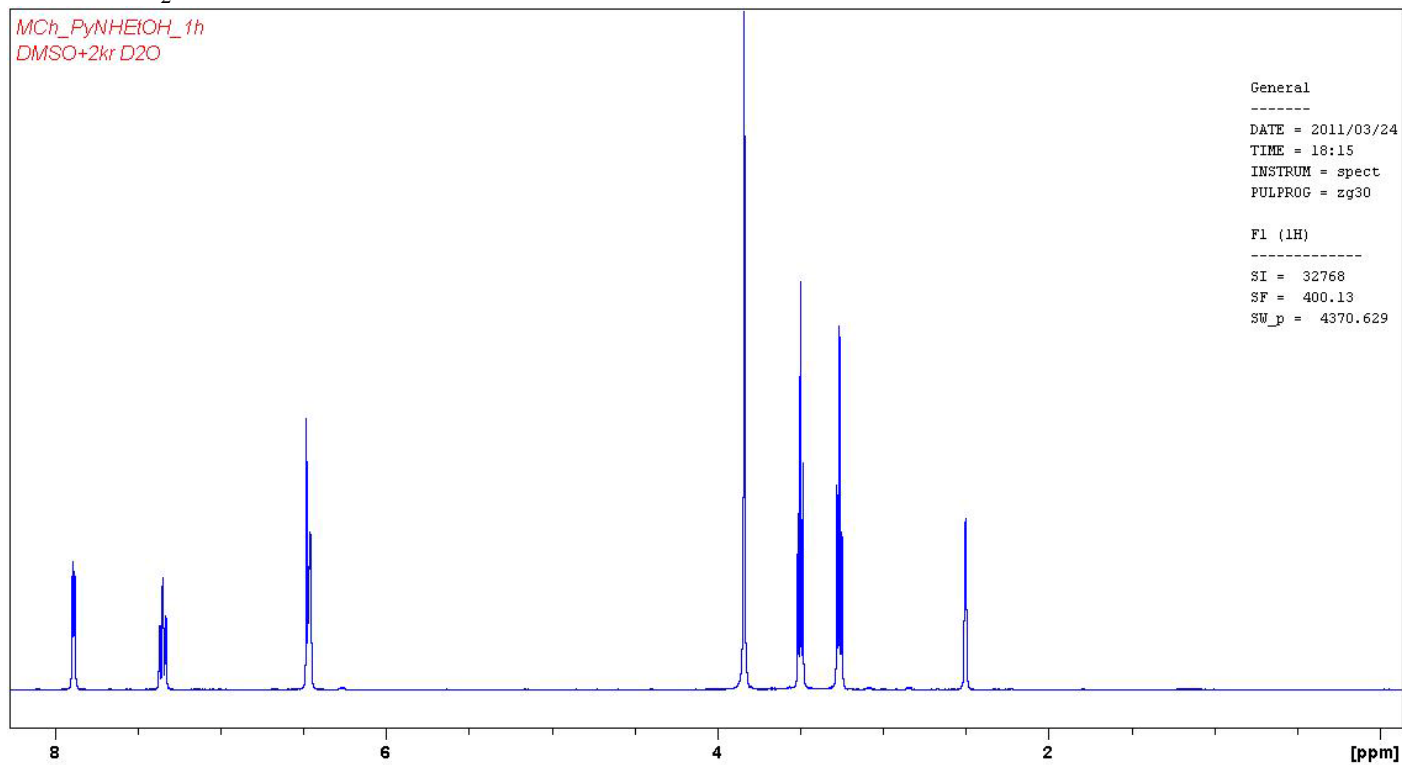



### <sup>13</sup>C NMR

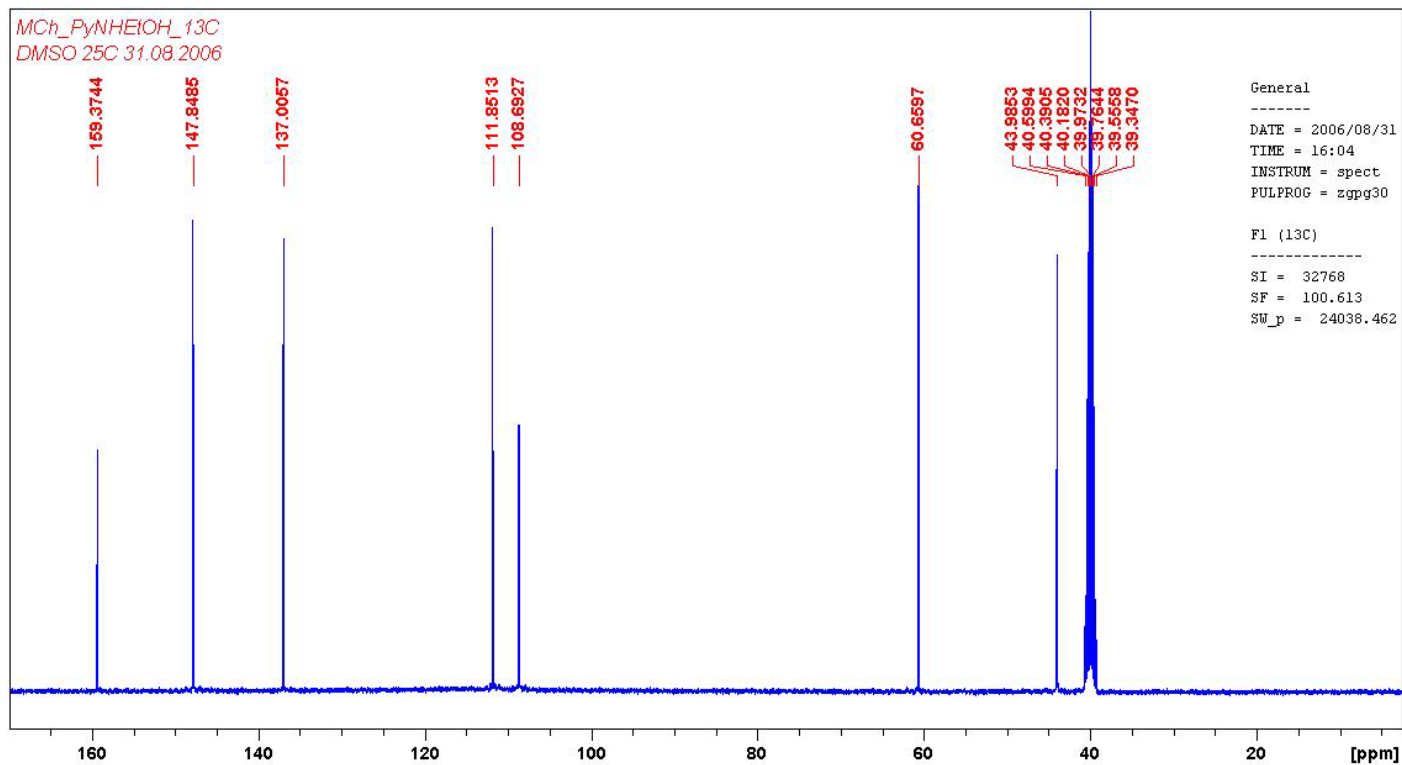

### COSY

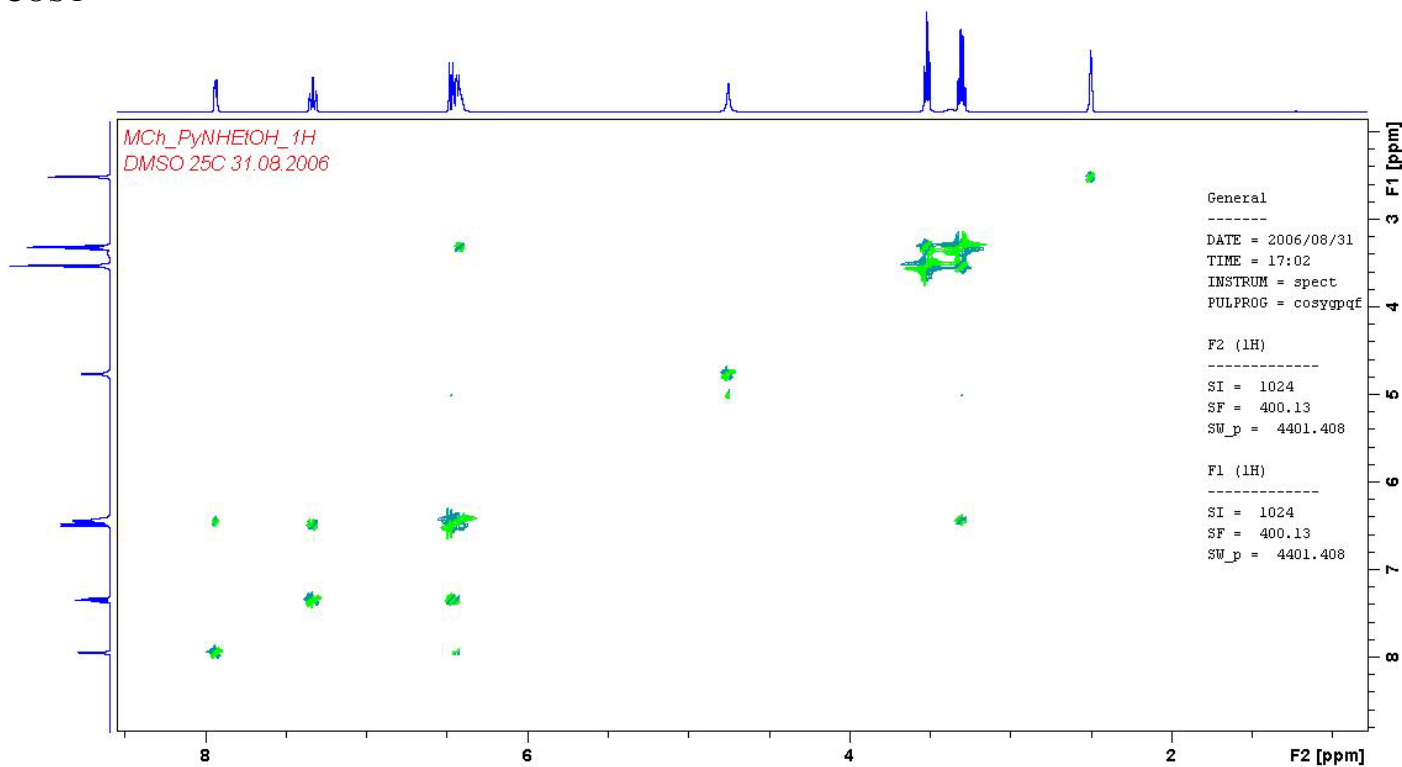

## NOESY

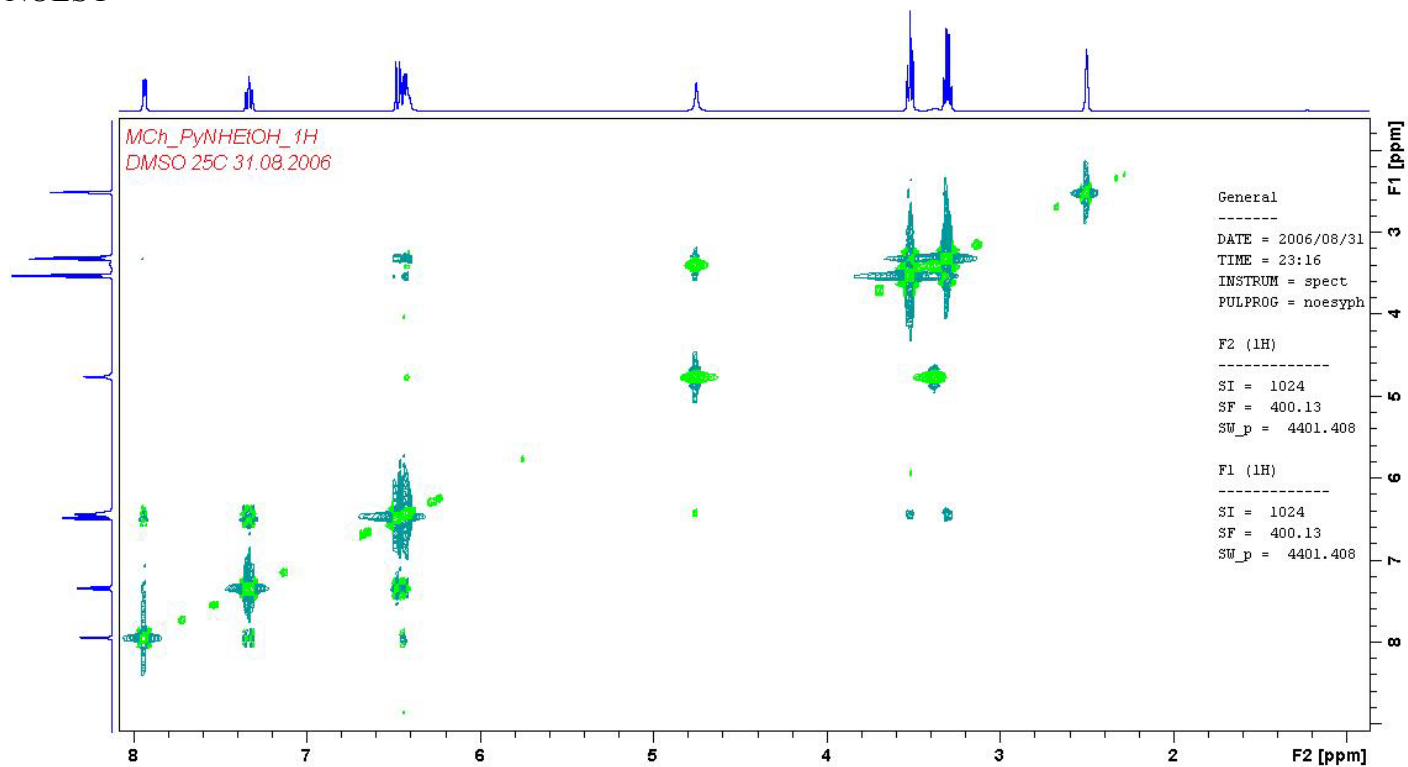

## NOESY+ D<sub>2</sub>O

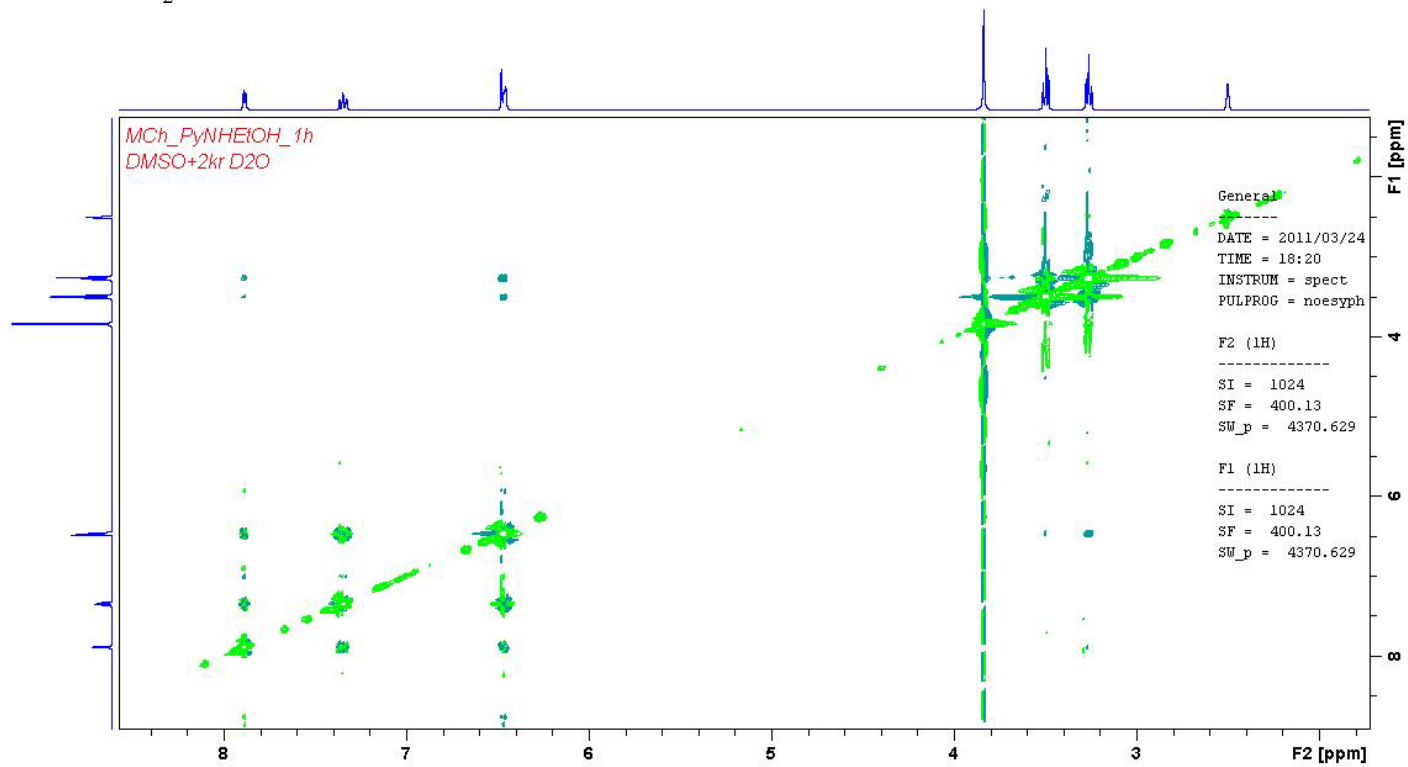

## MS analysis

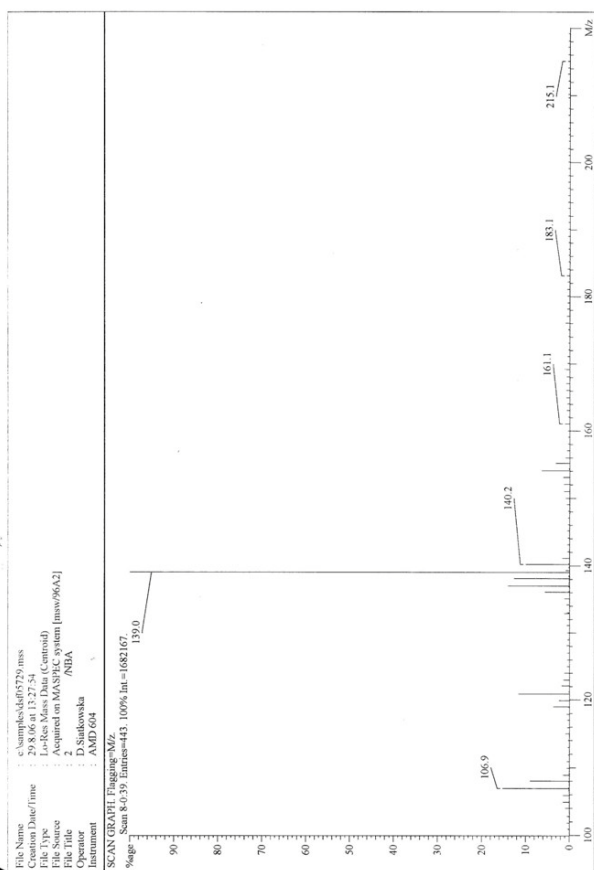

ASD05500.TXT

ATOMIC COMPOSITION REPORT

File Name : c:\samples\test3.mss.  
 File Date/Time : 7.9.06 at 12:52:22  
 File Type : Hi-Res Mass Spectrum  
 File Source : Acquired on MASEC system [msw/96A2]  
 as c:\samples\dsv05746.mss  
 File Title : 2 /NBA  
 Source File : c:\samples\dsv05746.mss  
 Source Scan(s) : 47:57

Sort Field : M/z (ascending).  
 Scan Filter : none.

Selected isotopes:

| Symbol | Min | Max | V'cy | Name        |
|--------|-----|-----|------|-------------|
| C      | 0   | 7   | 4    | Carbon-12   |
| H      | 4   | 11  | 1    | Hydrogen-1  |
| N      | 0   | 2   | 3    | Nitrogen-14 |
| O      | 0   | 1   | 2    | Oxygen-16   |

Allowable error = minimum of 10.0 ppm, 5.0 mmu.

Number of Peaks=8.  
 Base Peak=139.08638, 100% Int.=234253.

| Mass      | (%)    | Calculated | ppm | mmu | Formula     |
|-----------|--------|------------|-----|-----|-------------|
| 139.08638 | 100.00 | 139.08714  | 5.5 | 0.8 | C7.H11.N2.O |

\*\*\*\*\* End of Atomic Composition Report \*\*\*\*\*

Page 1

## Compound 3

### <sup>1</sup>H NMR

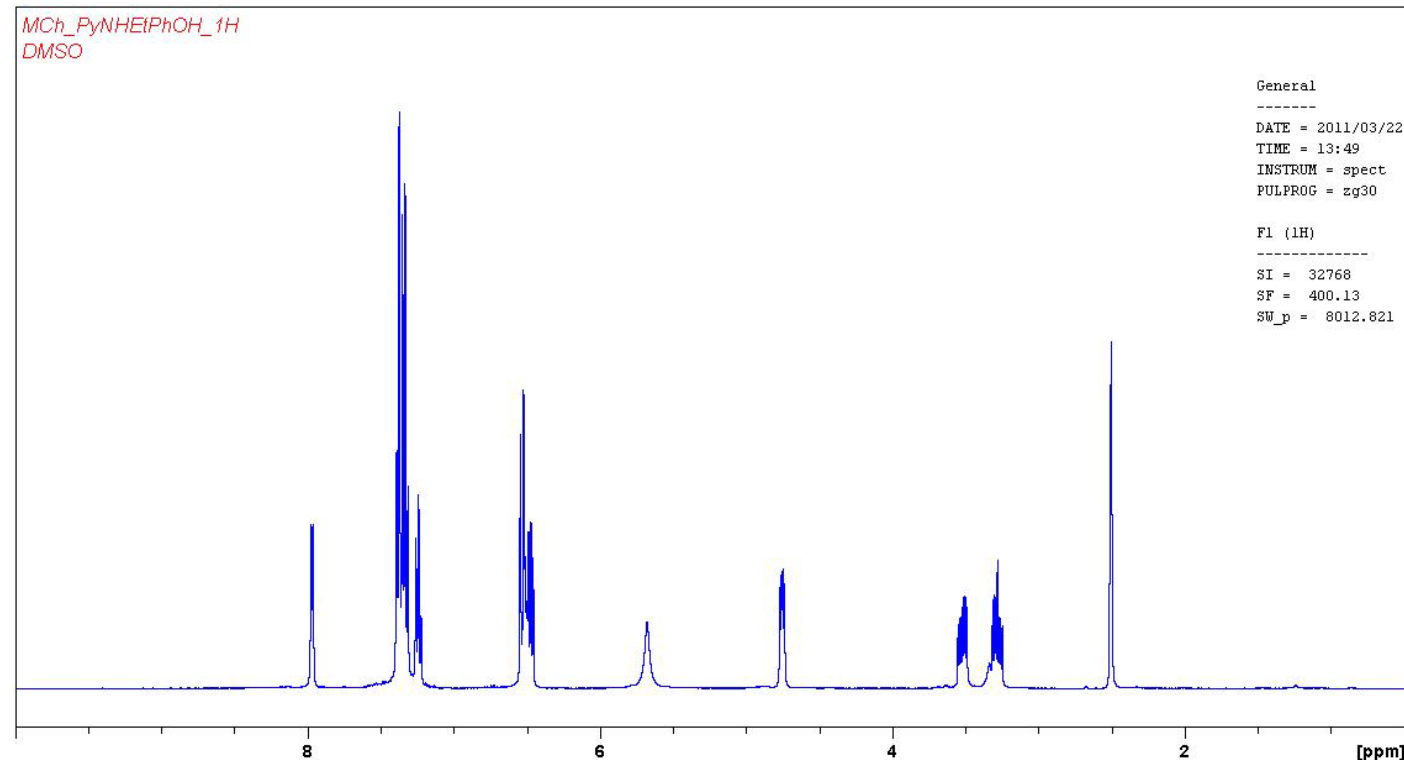

### $^1\text{H}$ NMR+D<sub>2</sub>O

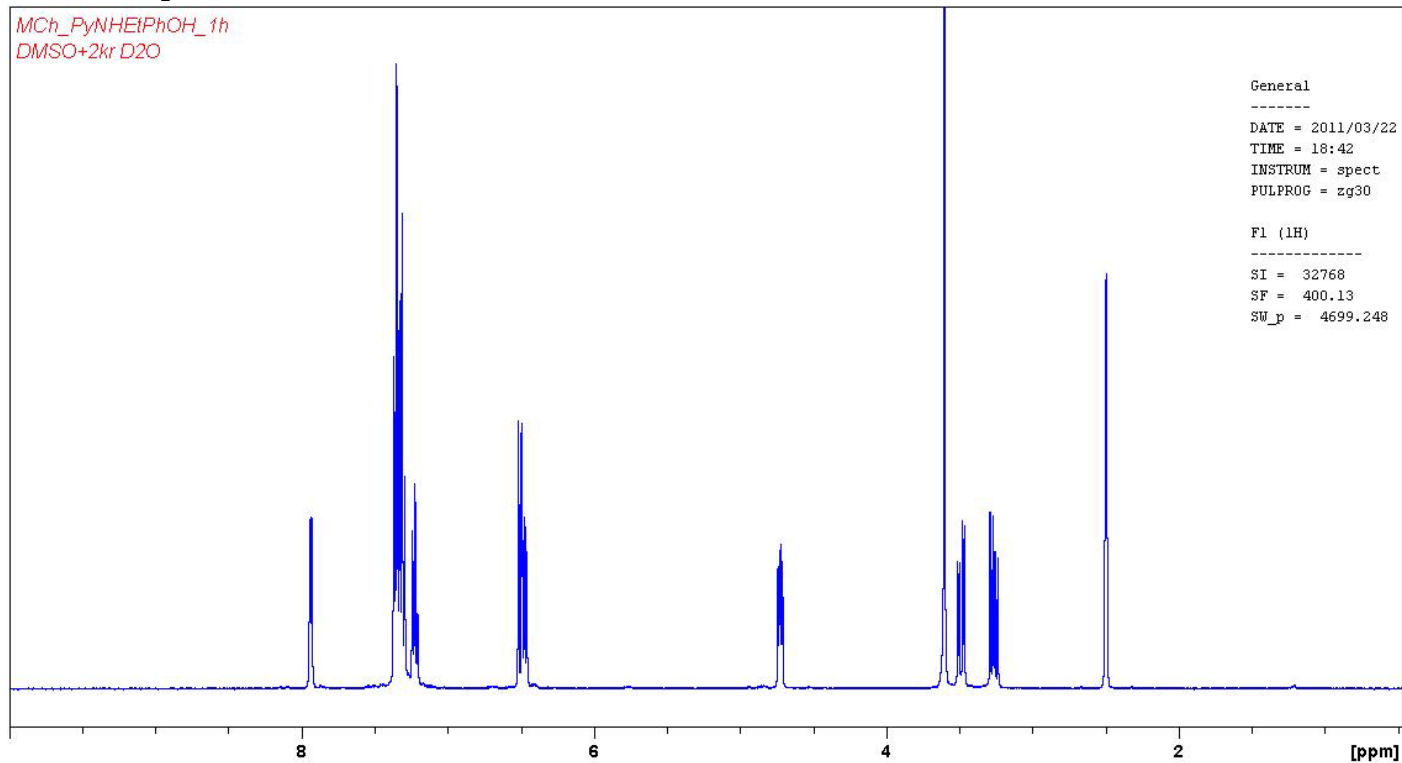

### $^{13}\text{C}$ NMR

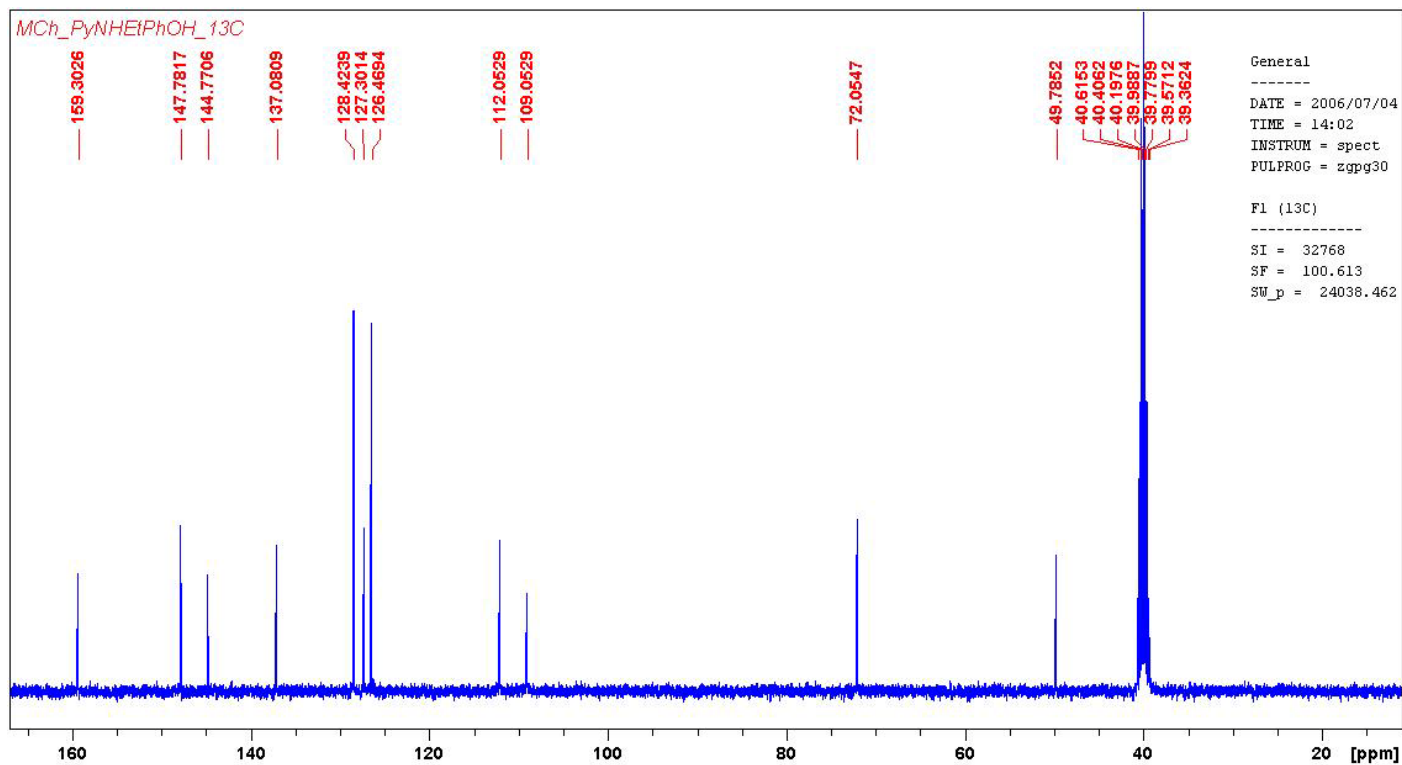

## COSY

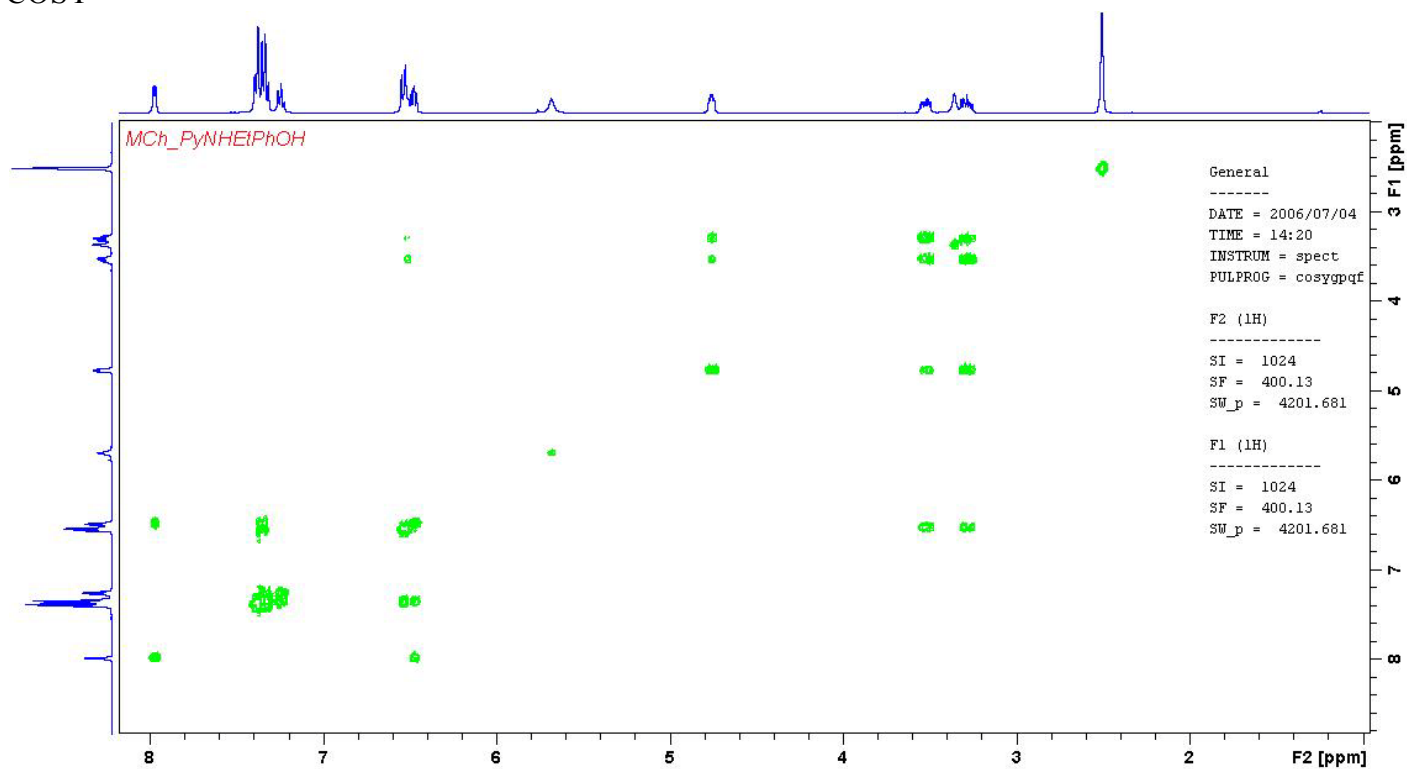

## NOESY

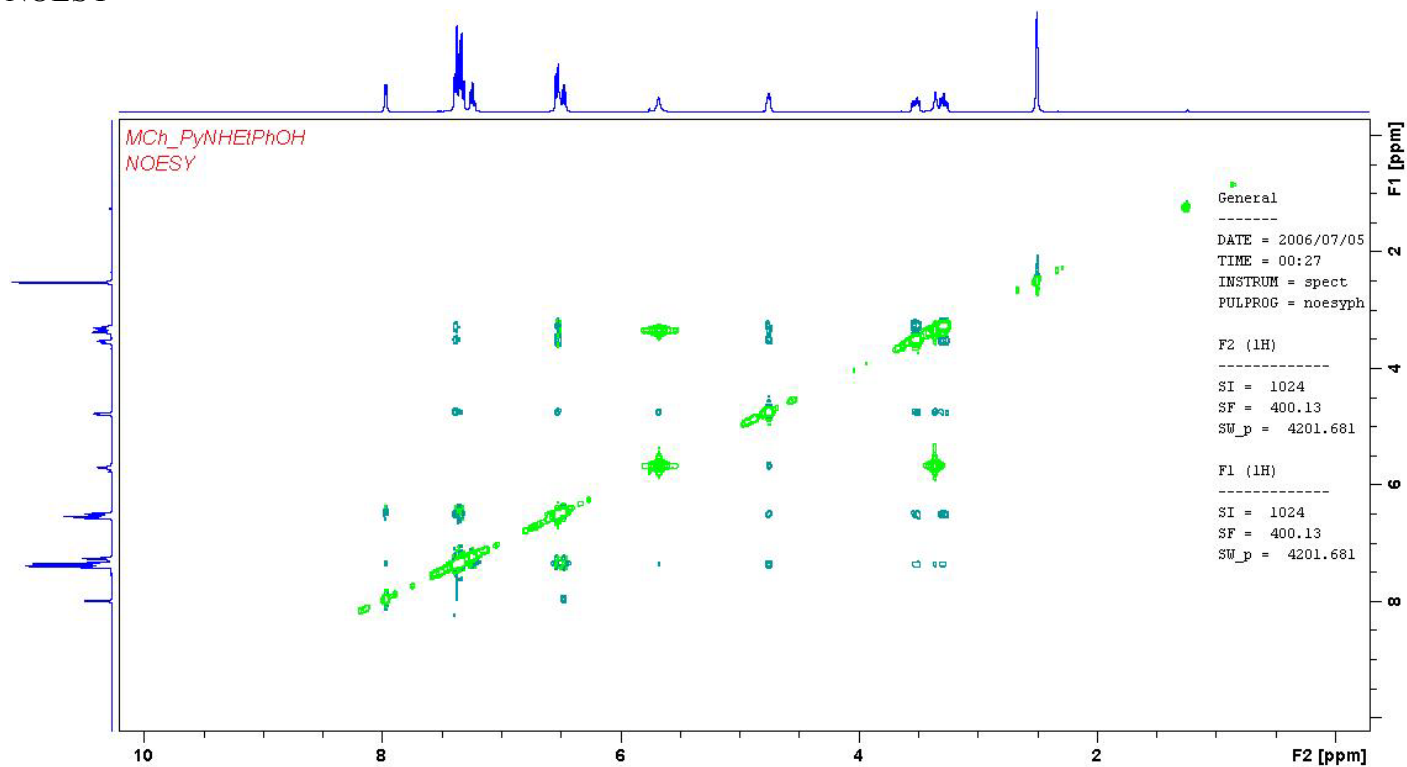

### NOESY+D<sub>2</sub>O

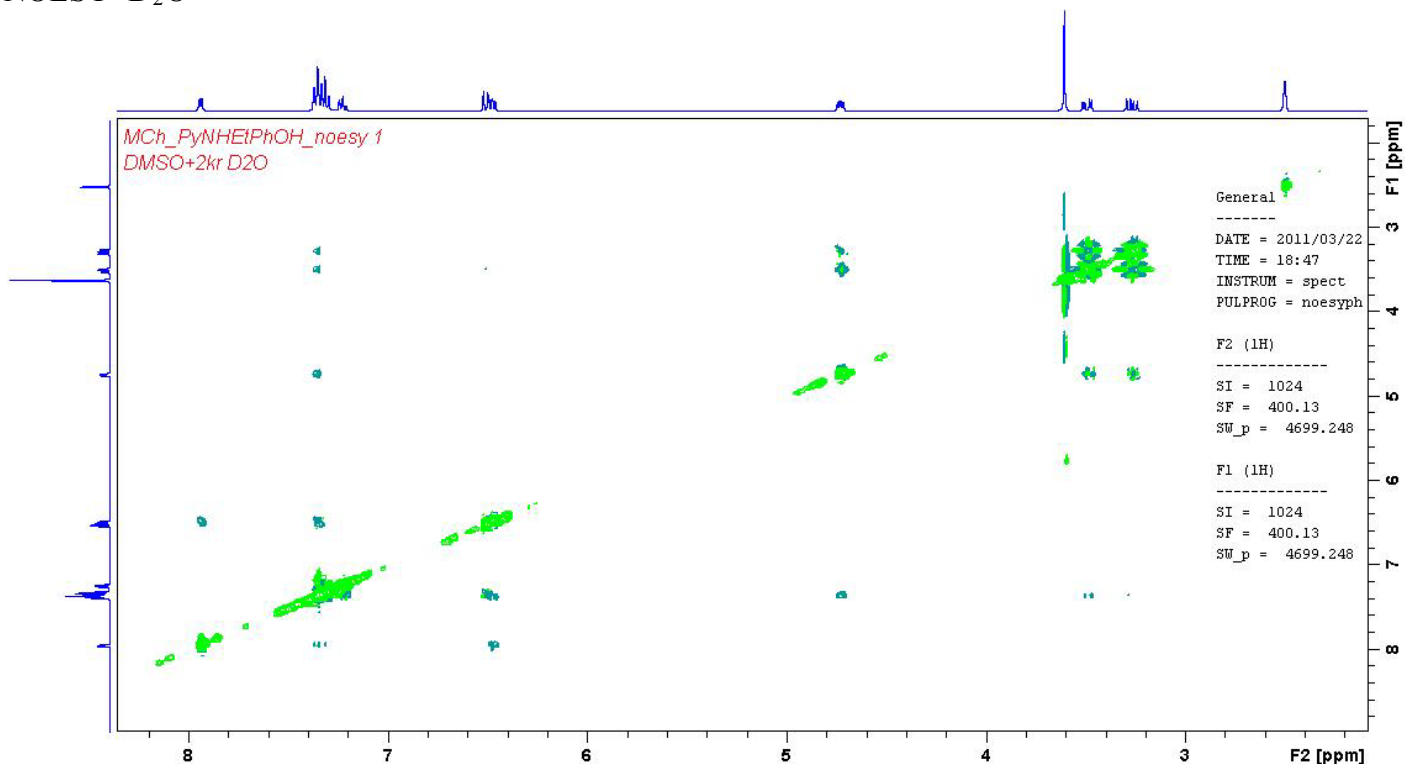

### MS analysis

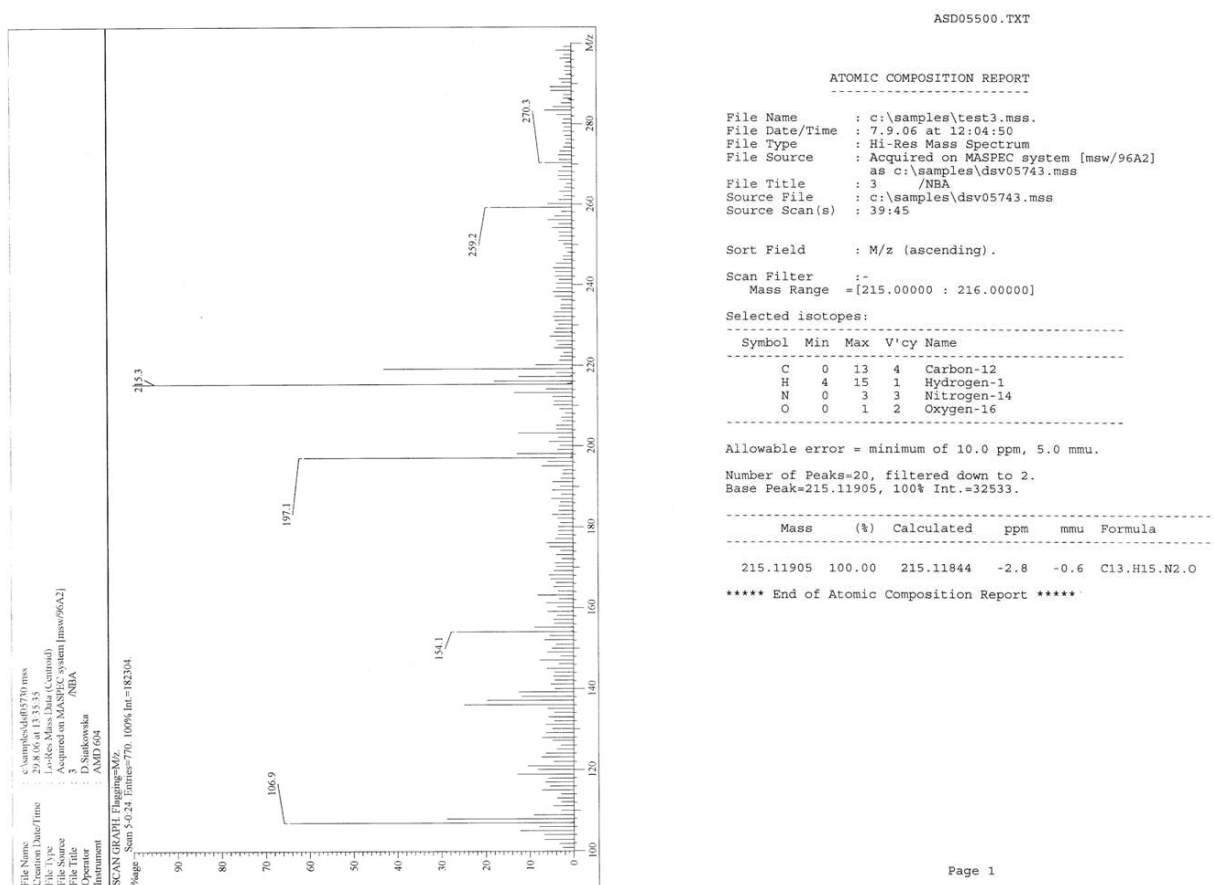

## Compound 4

### $^1\text{H}$ NMR

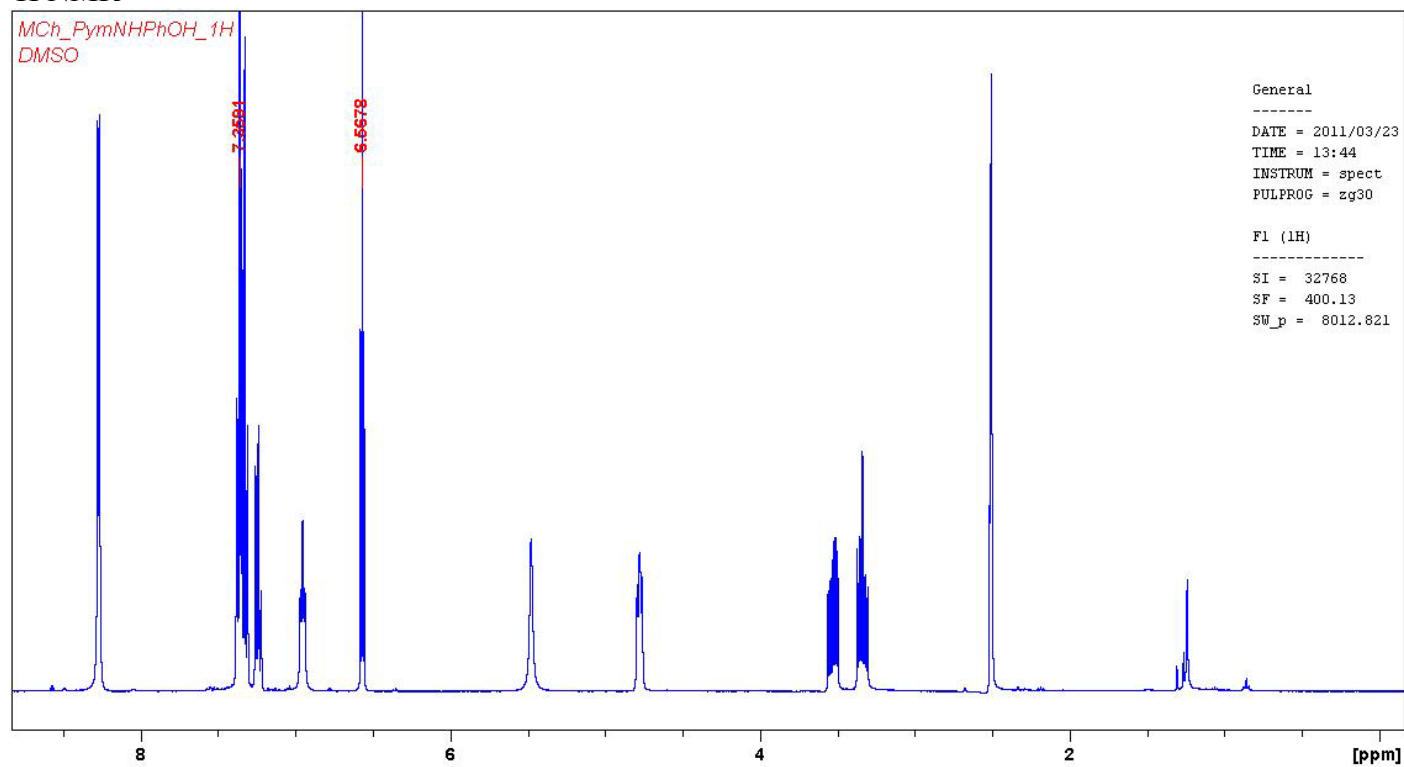

### $^1\text{H}$ NMR+D<sub>2</sub>O

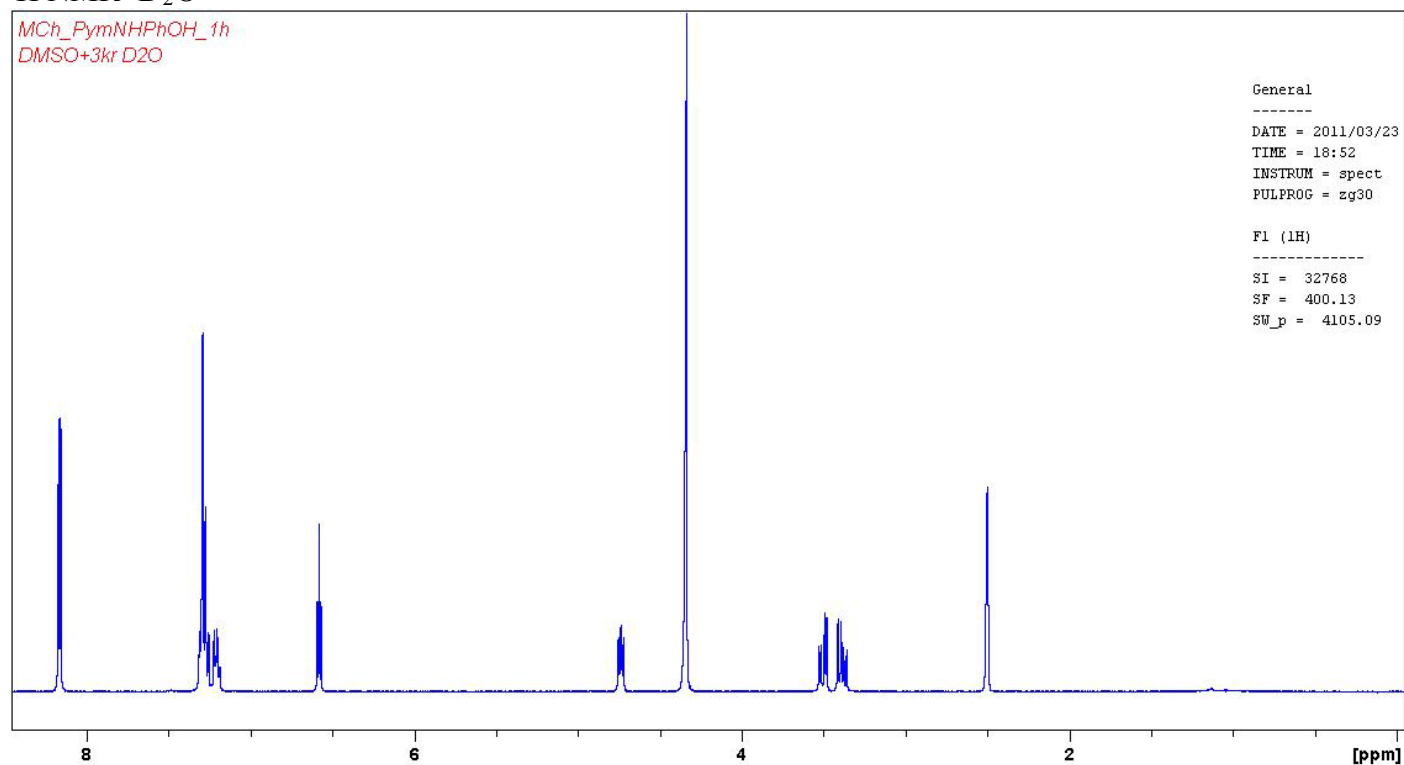

### <sup>13</sup>C NMR

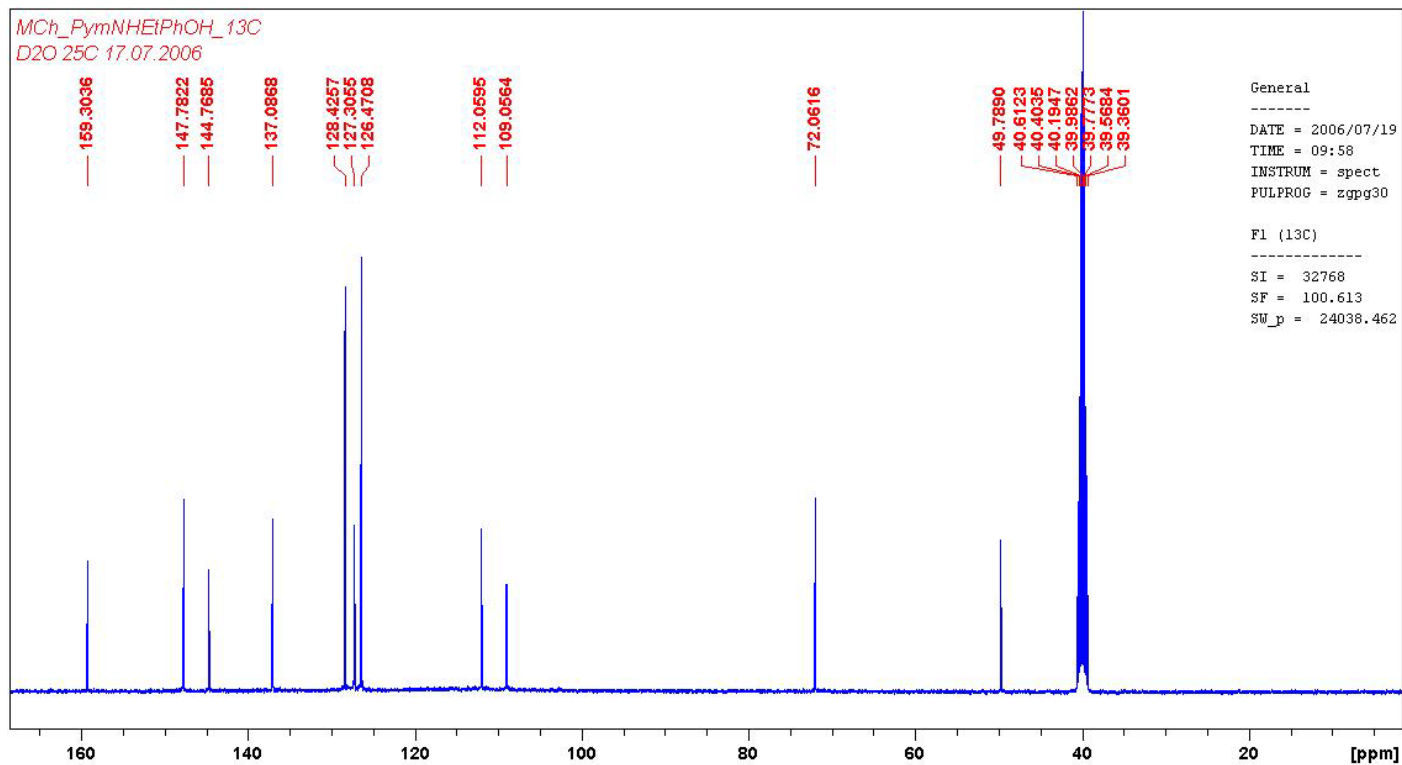

### COSY

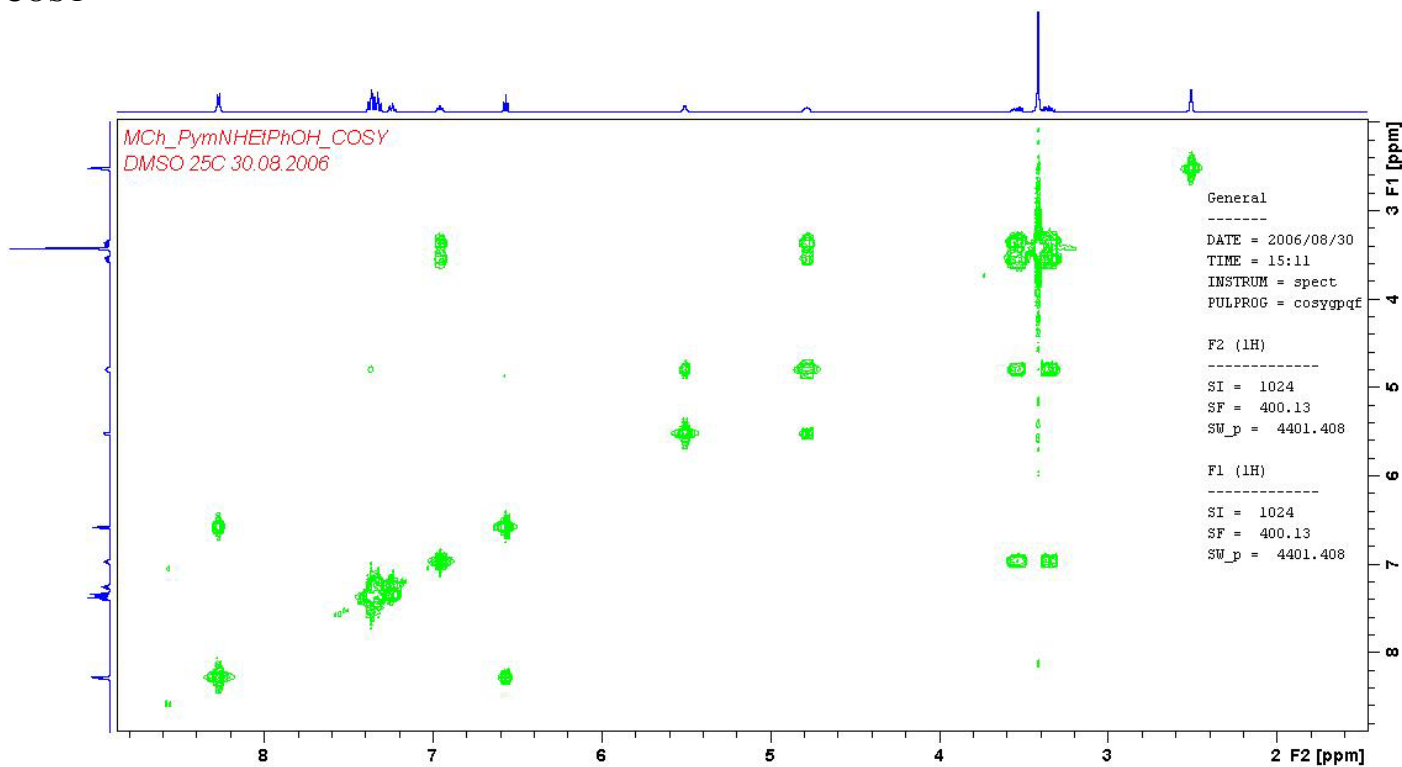



## NOESY

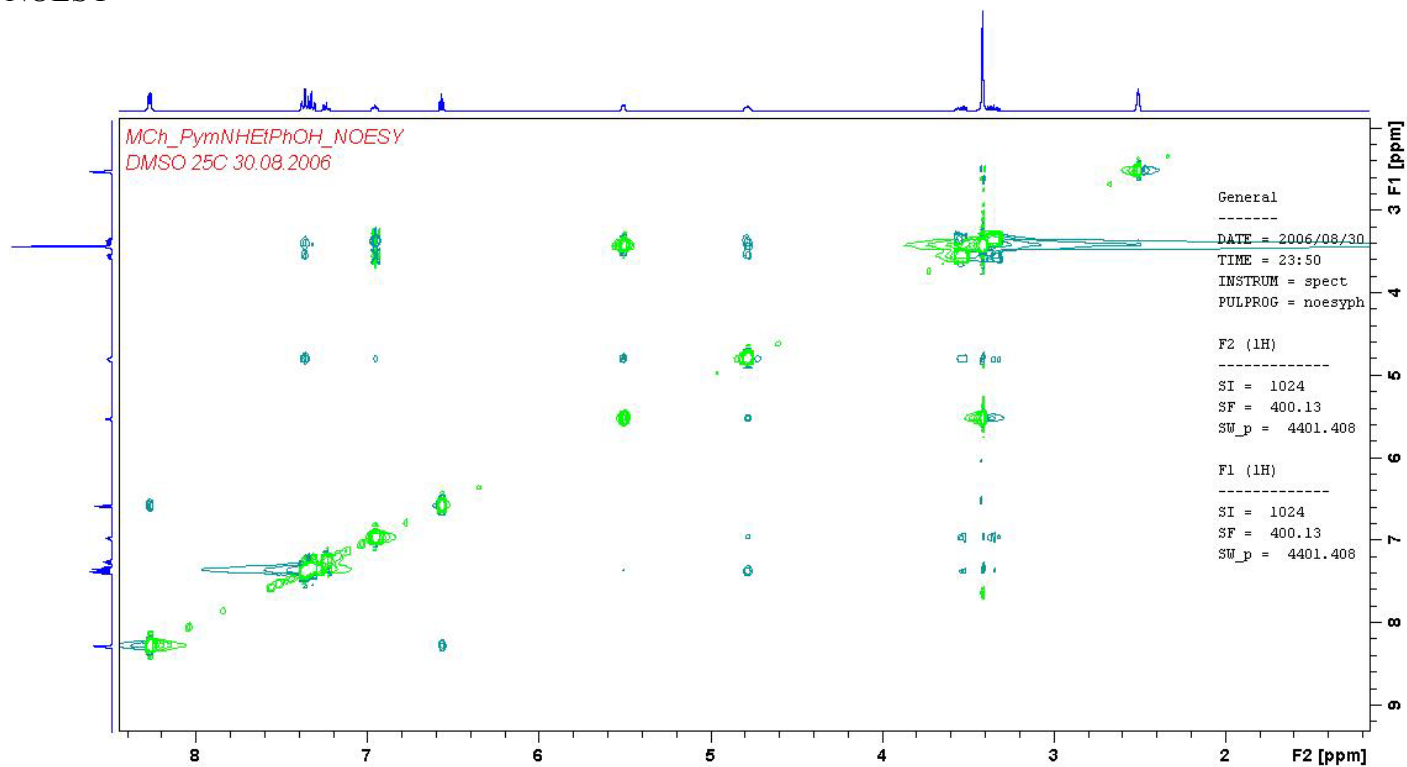

## NOESY+D<sub>2</sub>O

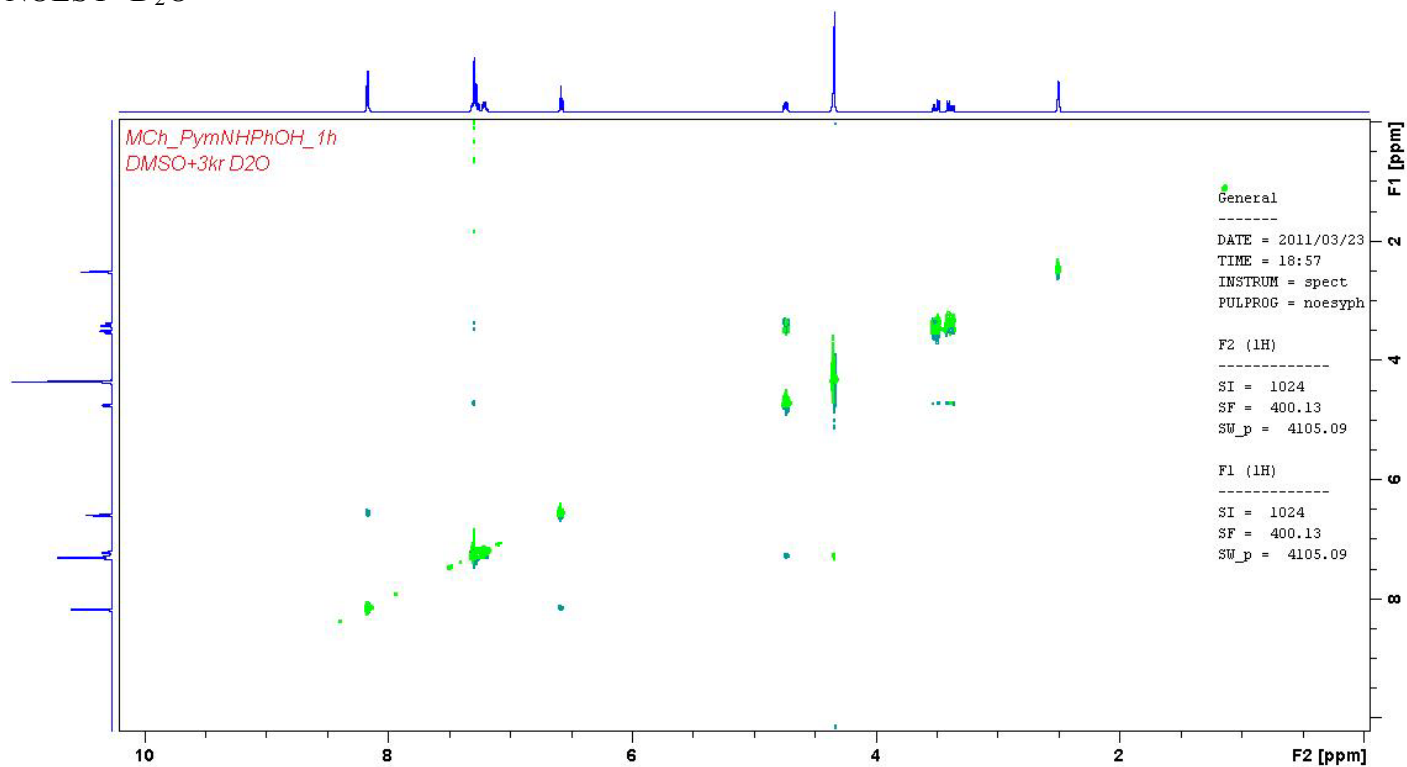

## MS analysis

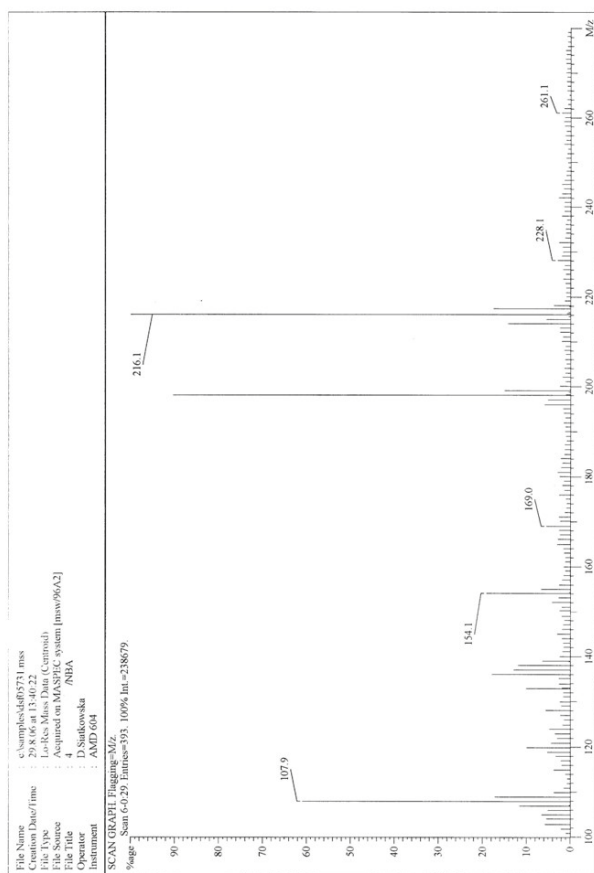

ASD05500.TXT

### ATOMIC COMPOSITION REPORT

File Name : c:\samples\test3.mss.  
 File Date/Time : 7.9.06 at 11:43:58  
 File Type : Hi-Res Mass Spectrum  
 File Source : Acquired on MASPAC system [msw/96A2]  
 as c:\samples\dsv05741.mss  
 File Title : 4 /NBA  
 Source File : c:\samples\dsv05741.mss  
 Source Scan(s) : 2:16

Sort Field : M/z (ascending).

Scan Filter : none.

Selected isotopes:

| Symbol | Min | Max | V'cy | Name        |
|--------|-----|-----|------|-------------|
| C      | 0   | 12  | 4    | Carbon-12   |
| H      | 4   | 14  | 1    | Hydrogen-1  |
| N      | 0   | 3   | 3    | Nitrogen-14 |
| O      | 0   | 1   | 2    | Oxygen-16   |

Allowable error = minimum of 10.0 ppm, 5.0 mmu.

Number of Peaks=12.

Base Peak=198.09870, 100% Int.=15115.

| Mass      | (%)   | Calculated | ppm | mmu | Formula      |
|-----------|-------|------------|-----|-----|--------------|
| 216.11295 | 56.90 | 216.11369  | 3.4 | 0.7 | C12.H14.N3.O |

\*\*\*\*\* End of Atomic Composition Report \*\*\*\*\*

Page 1

## Compound 5

### <sup>1</sup>H NMR

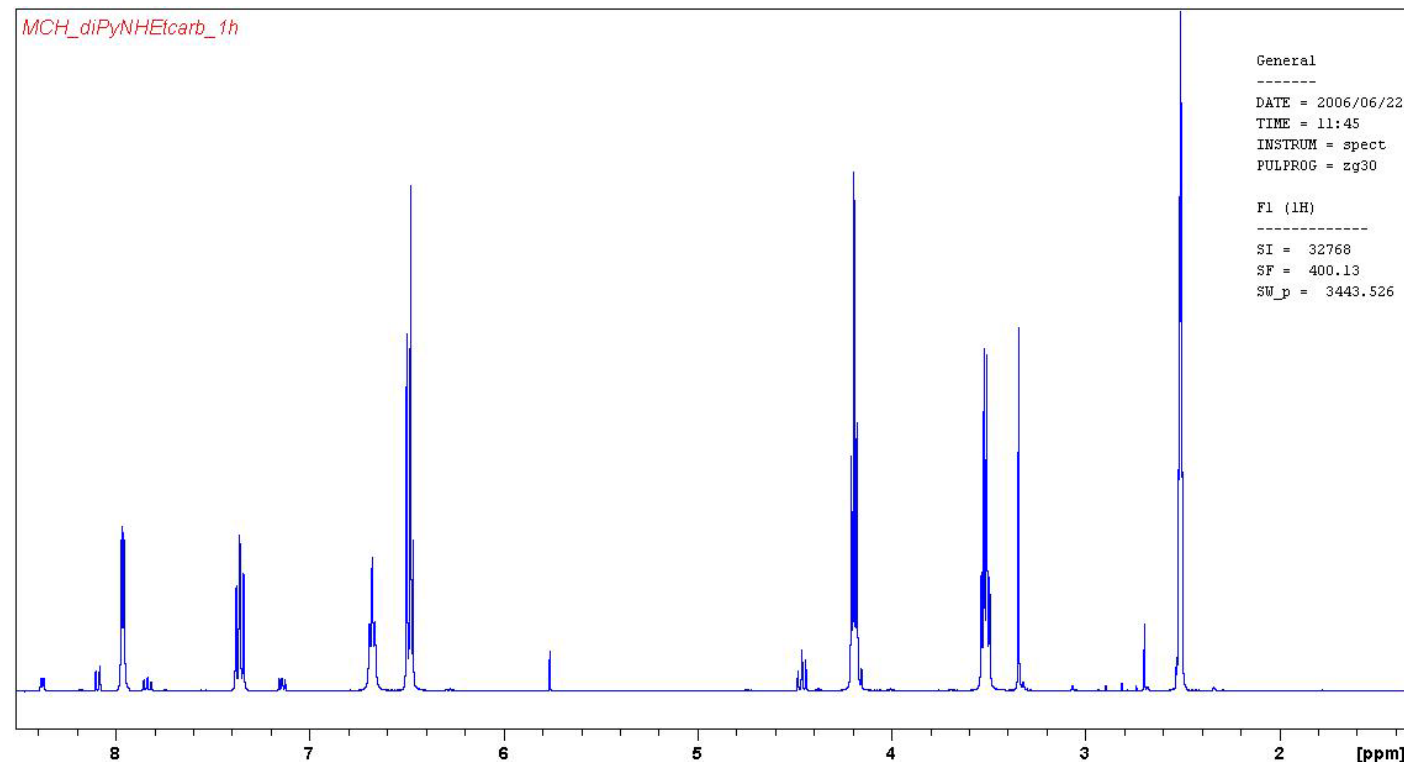

### <sup>13</sup>C NMR

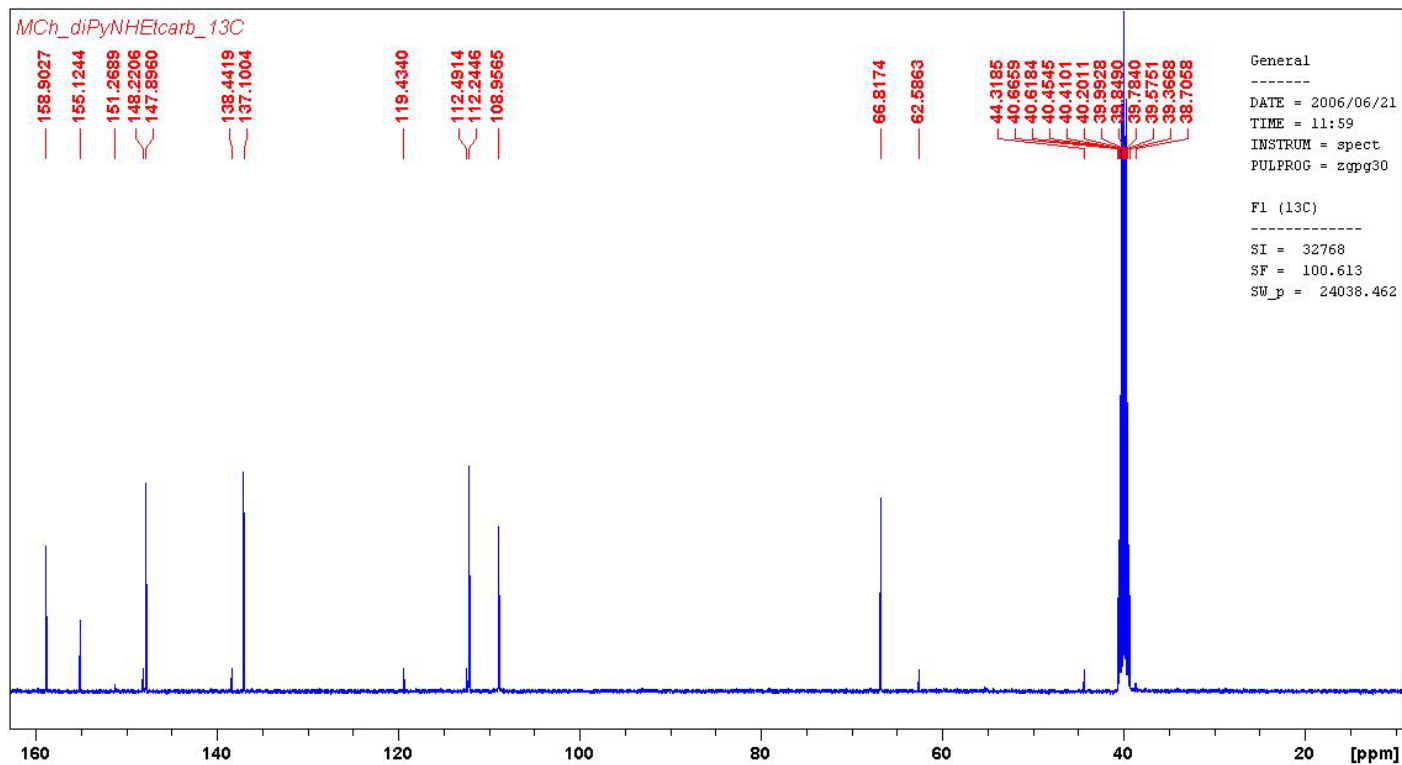

### COSY

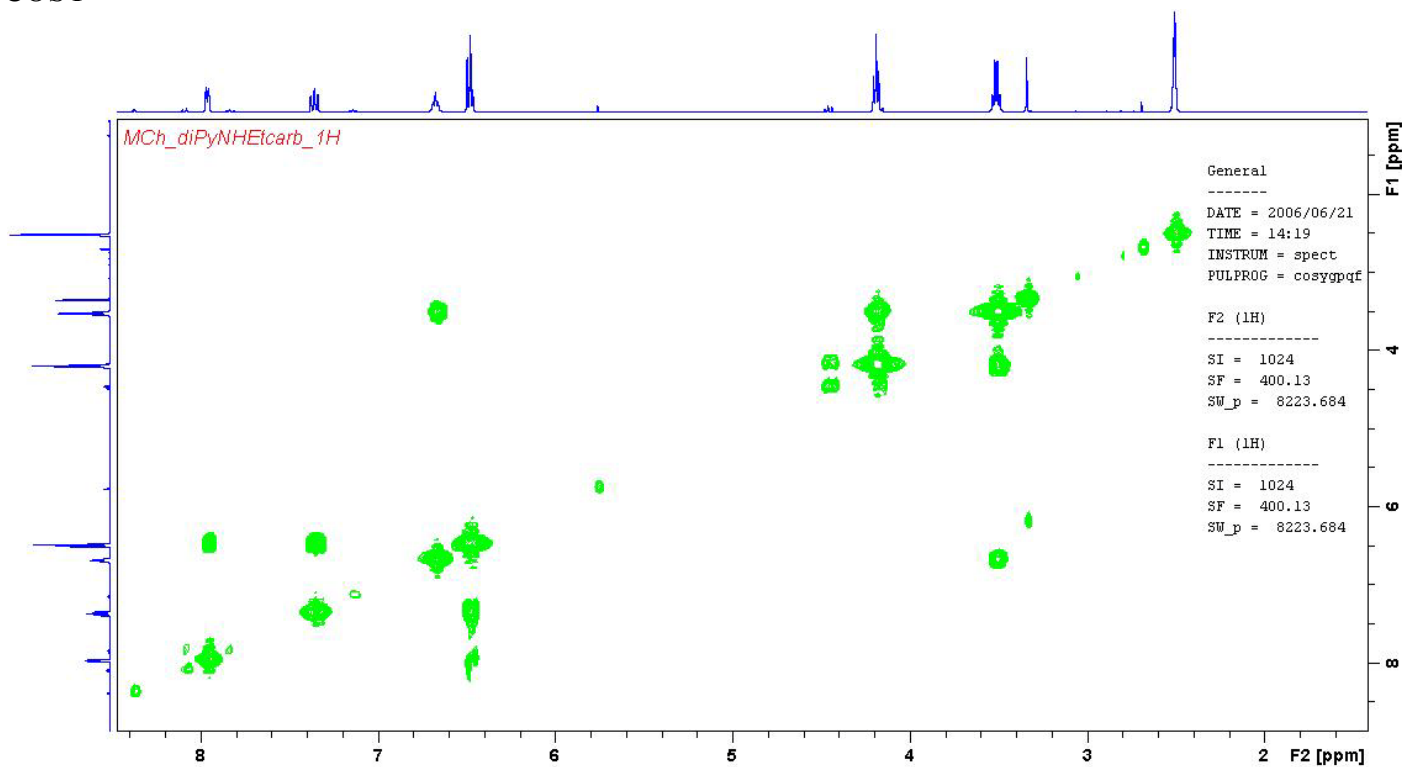

## MS analysis

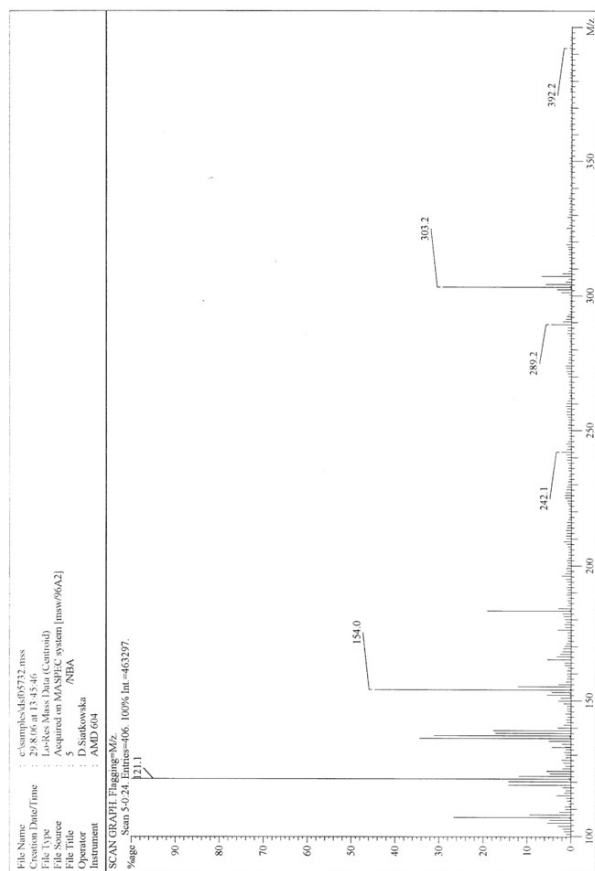

ASD05500.TXT

### ATOMIC COMPOSITION REPORT

File Name : c:\samples\test3.mss  
File Date/Time : 7.9.06 at 12:29:16  
File Type : Hi-Res Mass Spectrum  
File Source : Acquired on MASEC system [msw/96A2]  
as c:\samples\dsv05745.mss  
File Title : 5 /NBA  
Source File : c:\samples\dsv05745.mss  
Source Scan(s) : 11:23

Sort Field : M/z (ascending).

Scan Filter : none.

Selected isotopes:

| Symbol | Min | Max | V'cy | Name        |
|--------|-----|-----|------|-------------|
| C      | 0   | 15  | 4    | Carbon-12   |
| H      | 4   | 19  | 1    | Hydrogen-1  |
| N      | 0   | 4   | 3    | Nitrogen-14 |
| O      | 0   | 3   | 2    | Oxygen-16   |

Allowable error = minimum of 10.0 ppm, 5.0 mmu.

Number of Peaks=32.

Base Peak=229.13404, 100% Int.=164702.

| Mass      | (%)  | Calculated | ppm | mmu | Formula       |
|-----------|------|------------|-----|-----|---------------|
| 303.14464 | 1.70 | 303.14572  | 3.6 | 1.1 | C15.H19.N4.O3 |

\*\*\*\* End of Atomic Composition Report \*\*\*\*

Page 1

## Analysis of thermostability of compound 4

The compound **4** was converted into thermolabile 5'-carbonates in 3'-acetyl thymidine (see scheme below)

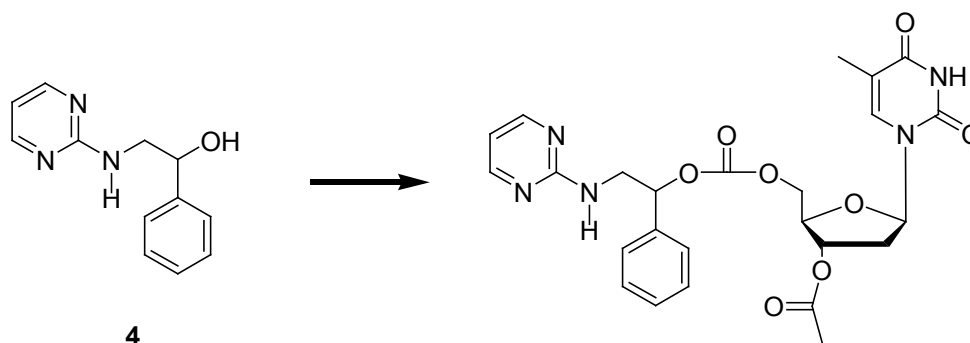

<sup>1</sup>H NMR spectrum of 5'-carbonates-3'-acetyl thymidine formed from **4**

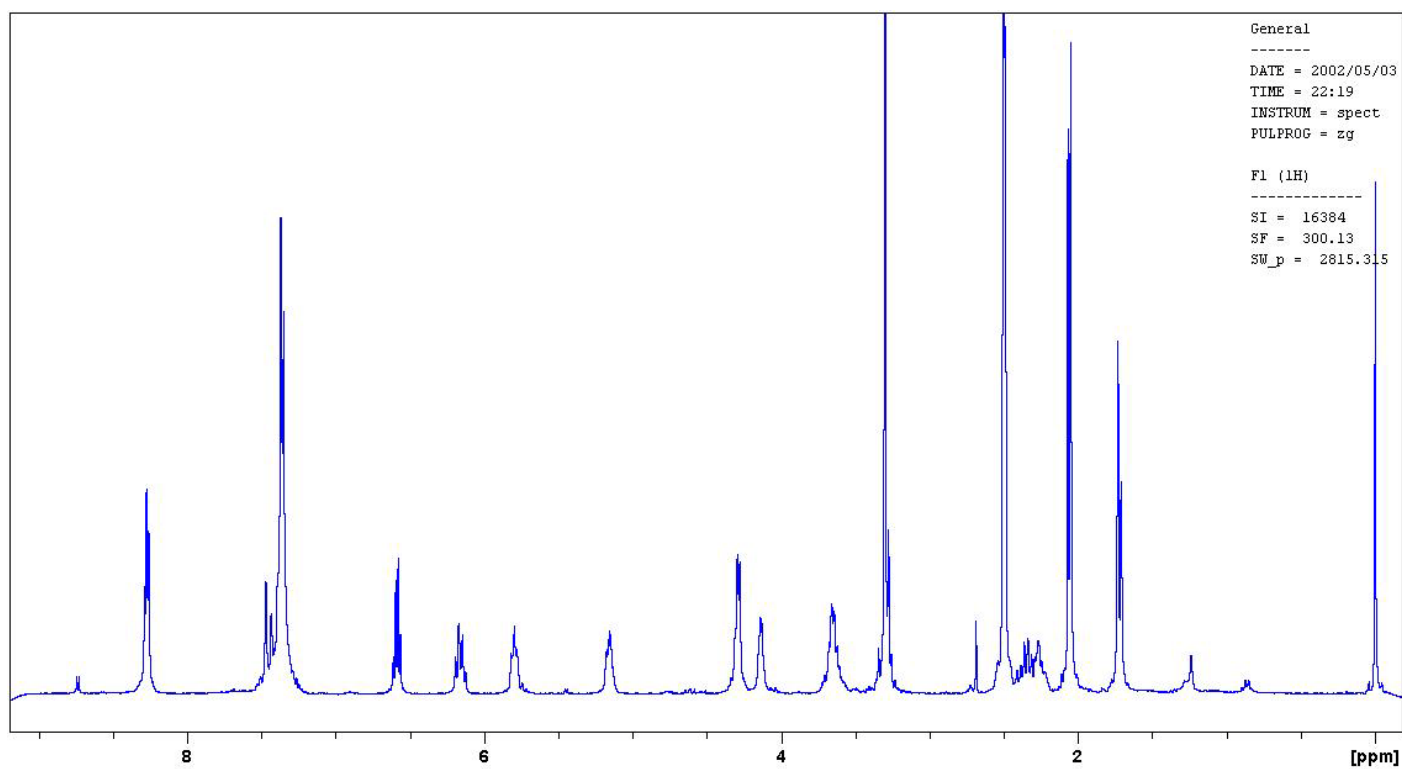

HPLC analysis of thermostability carbonates from **4** in 90 °C

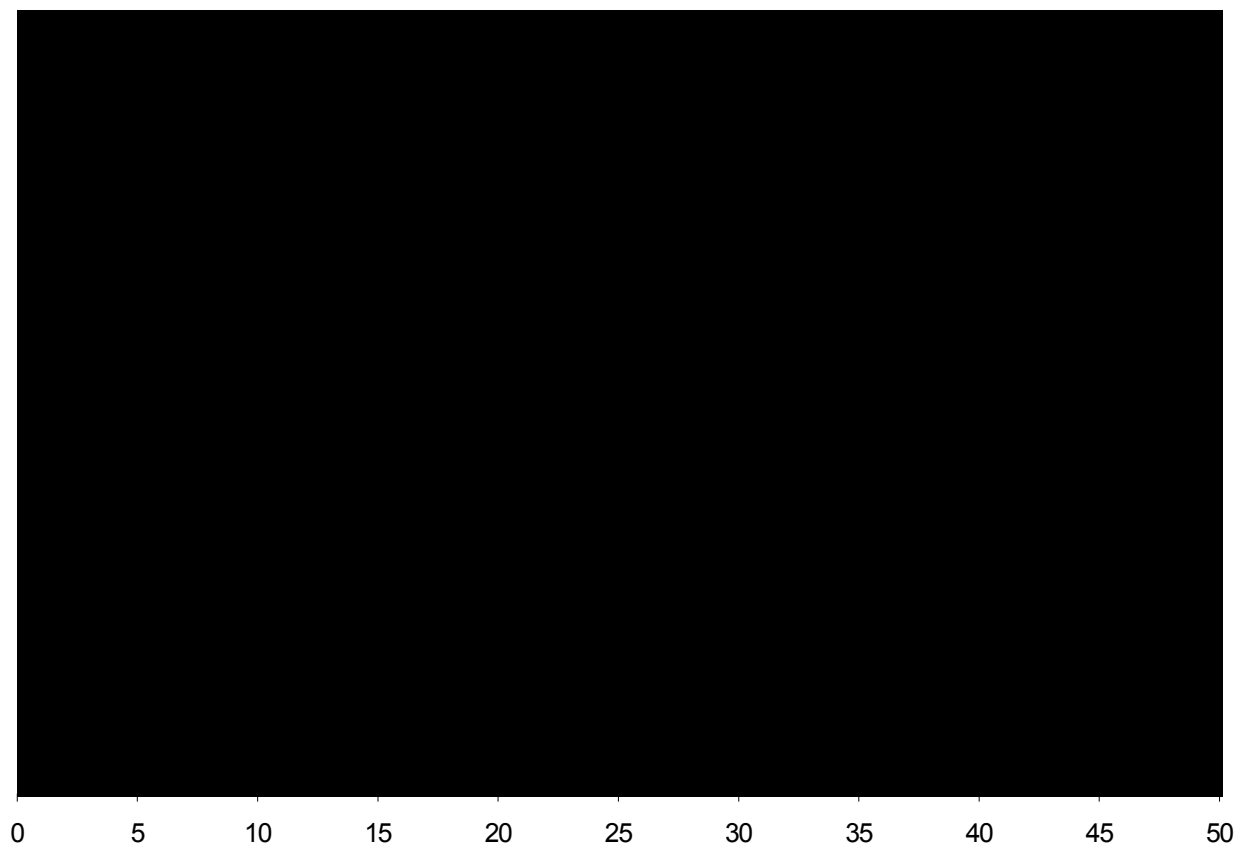

Supplement: c1nj20584f.pdf [file c1nj20584f.pdf]
